# Supplementary material
Source: PubMed Central journal article supplement (PMC6934185)
Supplement: jci-130-126595-s328.pdf [file jci-130-126595-s328.pdf]

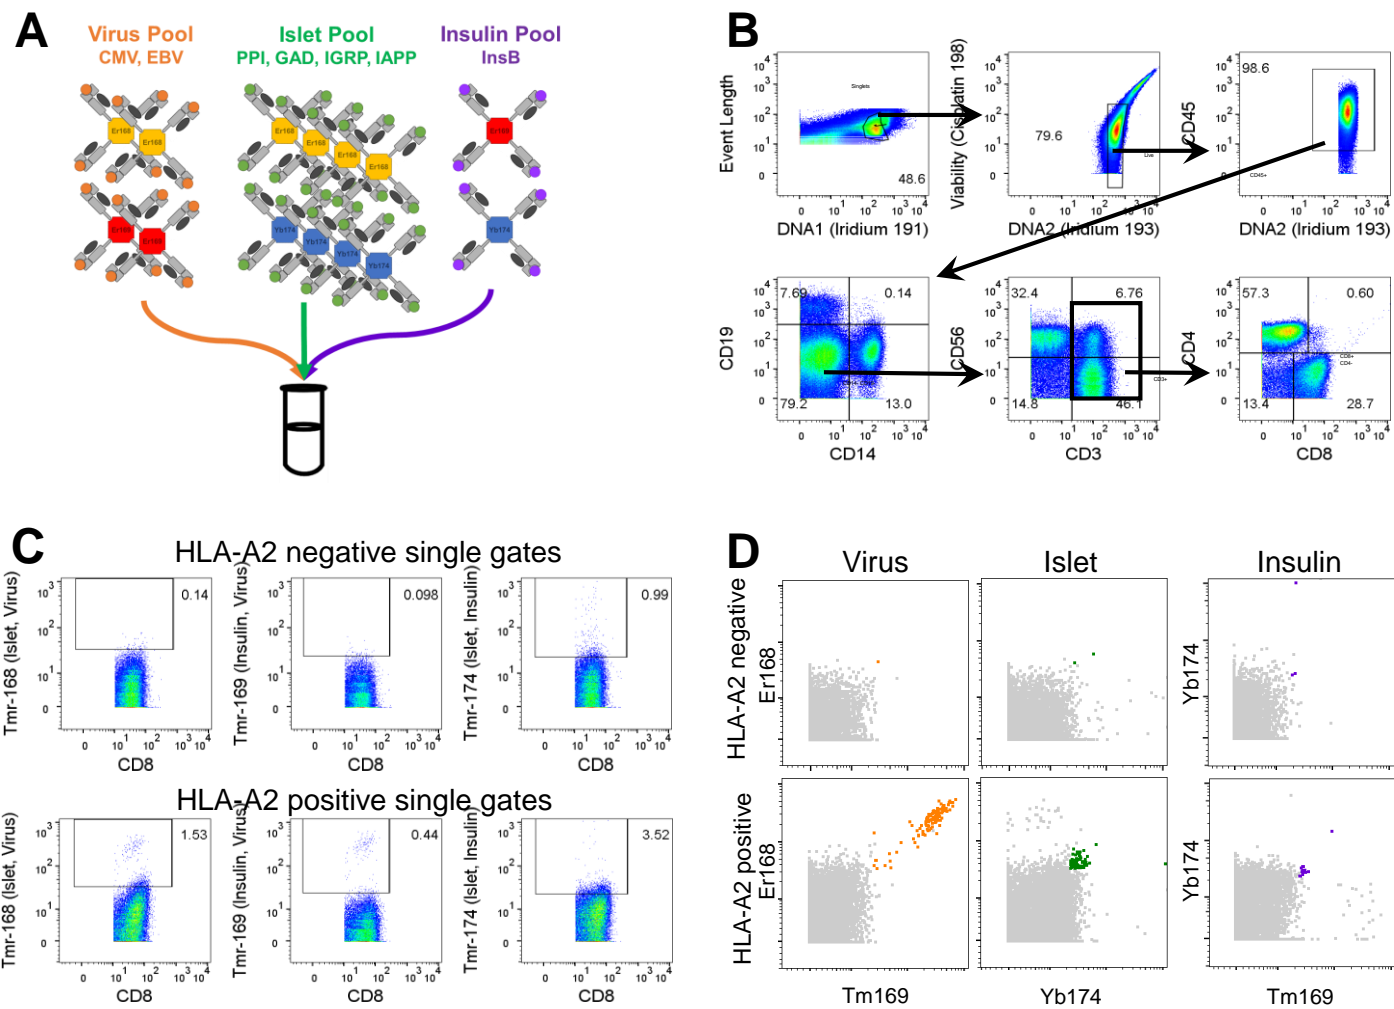

**Supplemental Figure 1. Detection of antigen-specific CD8<sup>+</sup> T cell populations using combinatorial Tmr staining.** (A) Schematic of the semi-combinatorial pooled antigen Tmr staining. (B) Total events were manually gated on singlet live cells that were CD45<sup>+</sup>CD14<sup>-</sup>CD19<sup>-</sup>CD3<sup>+</sup>CD4<sup>-</sup>CD8<sup>+</sup> to identify CD8<sup>+</sup> T cells. (C) Each of the three Tmr labels for HLA-A2 negative controls and positive samples were gated within total CD8<sup>+</sup> T cells. (D) Boolean gating was applied to identify cells that were labelled with two of the three metal isotopes, but not the third. Tmr<sup>+</sup> limit of detection was 0.02% of total CD8<sup>+</sup> T cells determined by a spike-in clone and all samples included >10,000 total CD8<sup>+</sup> T cells. Representative examples from an HLA-A2 negative or positive individual in which virus- (orange), islet- (green), or insulin-specific (purple) CD8<sup>+</sup> T cells were identified and overlaid on total CD8 T cells (gray). Tmr, tetramer.

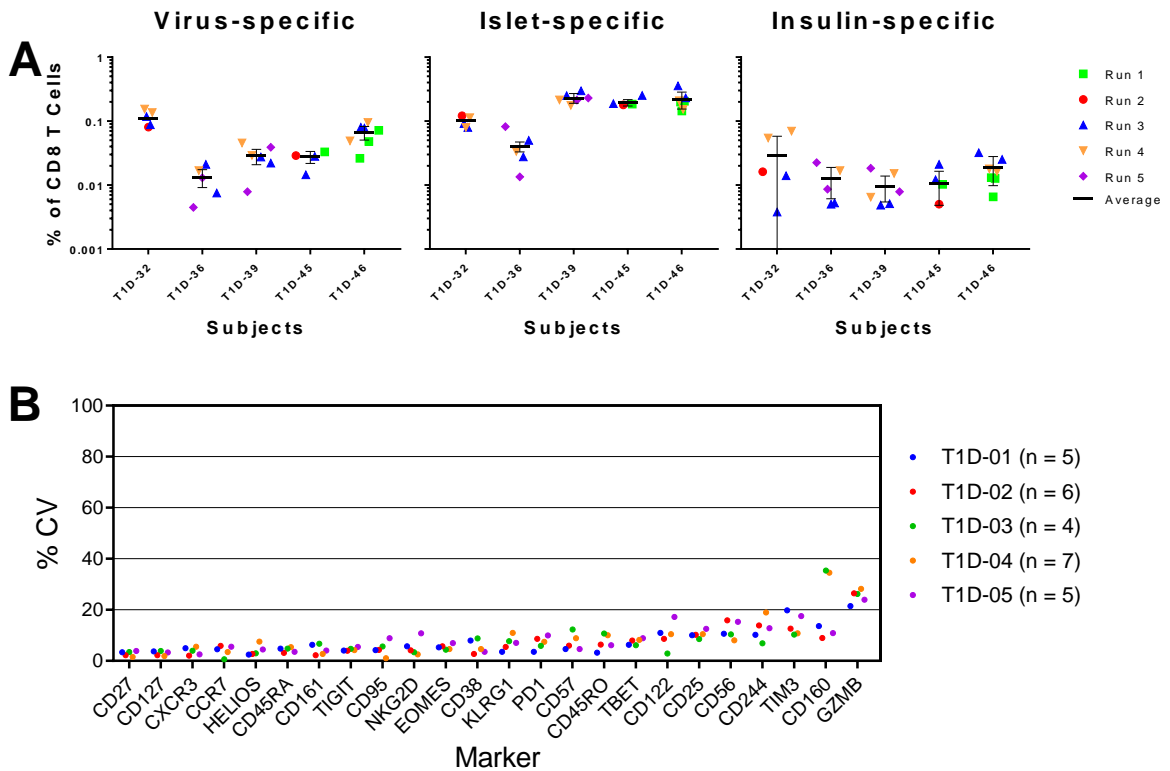

**Supplemental Figure 2. Reproducible detection and phenotyping of antigen-specific CD8<sup>+</sup> T cell populations.** Five T1D subjects (Supplemental Table 3) with multiple aliquots of cryopreserved PBMC were thawed, stained, and acquired using a 35-parameter mass cytometry panel on three separate days (runs) per subject, with replicates performed on selected days. Total and antigen-specific CD8<sup>+</sup> T cells were gated as in Supplemental Figure 1. **(A)** Frequency of antigen-specific CD8<sup>+</sup> T cells; mean % coefficient of variation (CV) for virus-, islet-, and insulin-specific CD8<sup>+</sup> T cells of  $27 \pm 4\%$ ,  $19 \pm 7\%$ , and  $59 \pm 23$ , respectively. Black horizontal lines with error bars represent geometric mean  $\pm$  geometric SD. **(B)** %CV of the mean hyperbolic arcsine-transformed intensity of each of 24 markers on CD8<sup>+</sup> T cells across all replicates for each of the five subjects. CV, coefficient of variation.

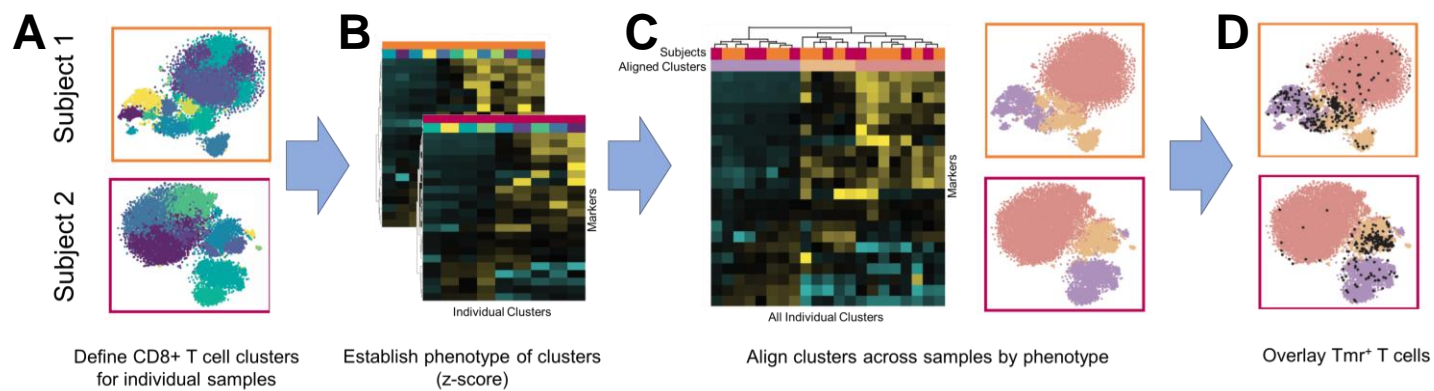

**Supplemental Figure 3. Details of DISCOV-R (DIStribution analysis across Clusters of a parent population Overlaid with a Rare subpopulation).** DISCOV-R was applied to two representative subjects (orange or pink) that were assayed with a 35-parameter CyTOF panel to identify and phenotype antigen-specific (Tmr<sup>+</sup>) CD8<sup>+</sup> T cells. **(A)** The parent population (CD8<sup>+</sup> T cells) is clustered for each individual using Phenograph and visualized on a 2D tSNE (clusters represented as colors). **(B)** Z-score normalized average expression (compared to total CD8<sup>+</sup> T cells) of all phenotyping markers for all clusters from individual samples. **(C)** Hierarchical clustering of average z-score normalized expression of all clusters from all individual samples to align clusters across samples (three, indicated by color in bar at top of graph). **(D)** Islet-specific (Tmr<sup>+</sup>) CD8<sup>+</sup> T cell events are overlaid onto the aligned clusters to assess their distribution. Tmr, tetramer.

Cluster 1 2 3 4 5 6 7 8 9 10 11 12

□ Islet

▲ Insulin

● Virus

T1D-01  
27 Tmr+ cells

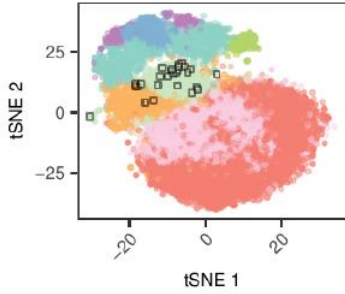

T1D-01  
7 Tmr+ cells

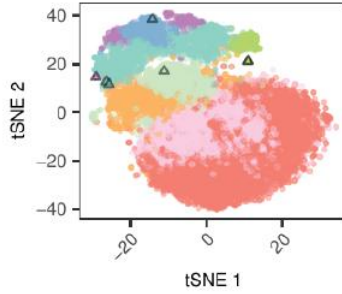

T1D-01  
11 Tmr+ cells

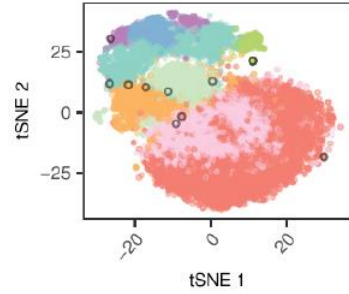

T1D-02  
199 Tmr+ cells

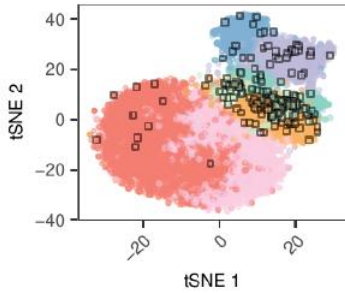

T1D-02  
4 Tmr+ cells

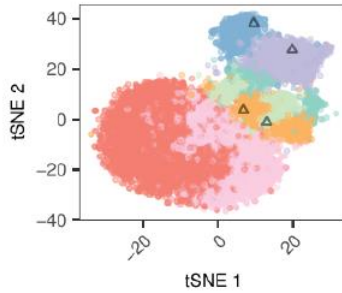

T1D-02  
31 Tmr+ cells

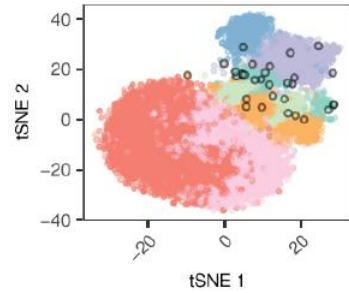

T1D-03  
9 Tmr+ cells

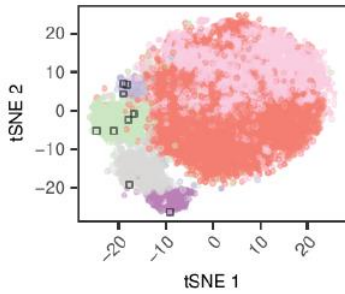

T1D-03  
2 Tmr+ cells

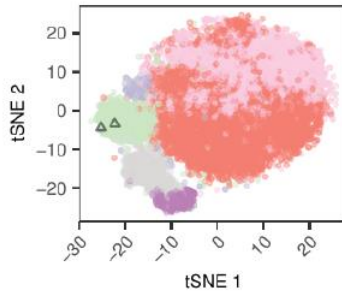

T1D-03  
27 Tmr+ cells

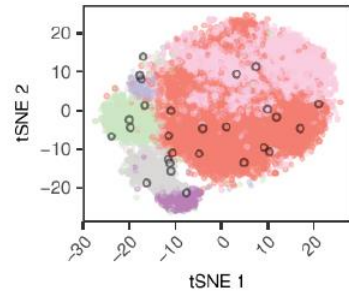

T1D-04  
48 Tmr+ cells

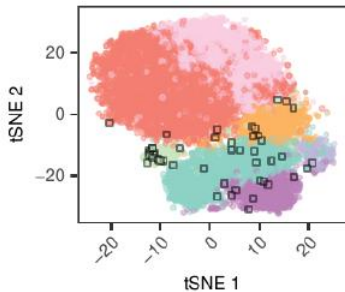

T1D-04  
22 Tmr+ cells

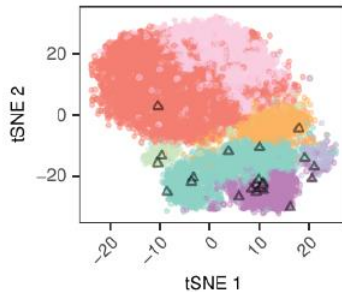

T1D-04  
38 Tmr+ cells

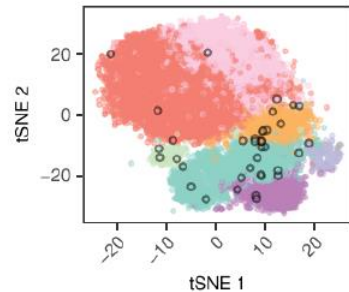

Cluster 1 2 3 4 5 6 7 8 9 10 11 12

□ Islet

▲ Insulin

● Virus

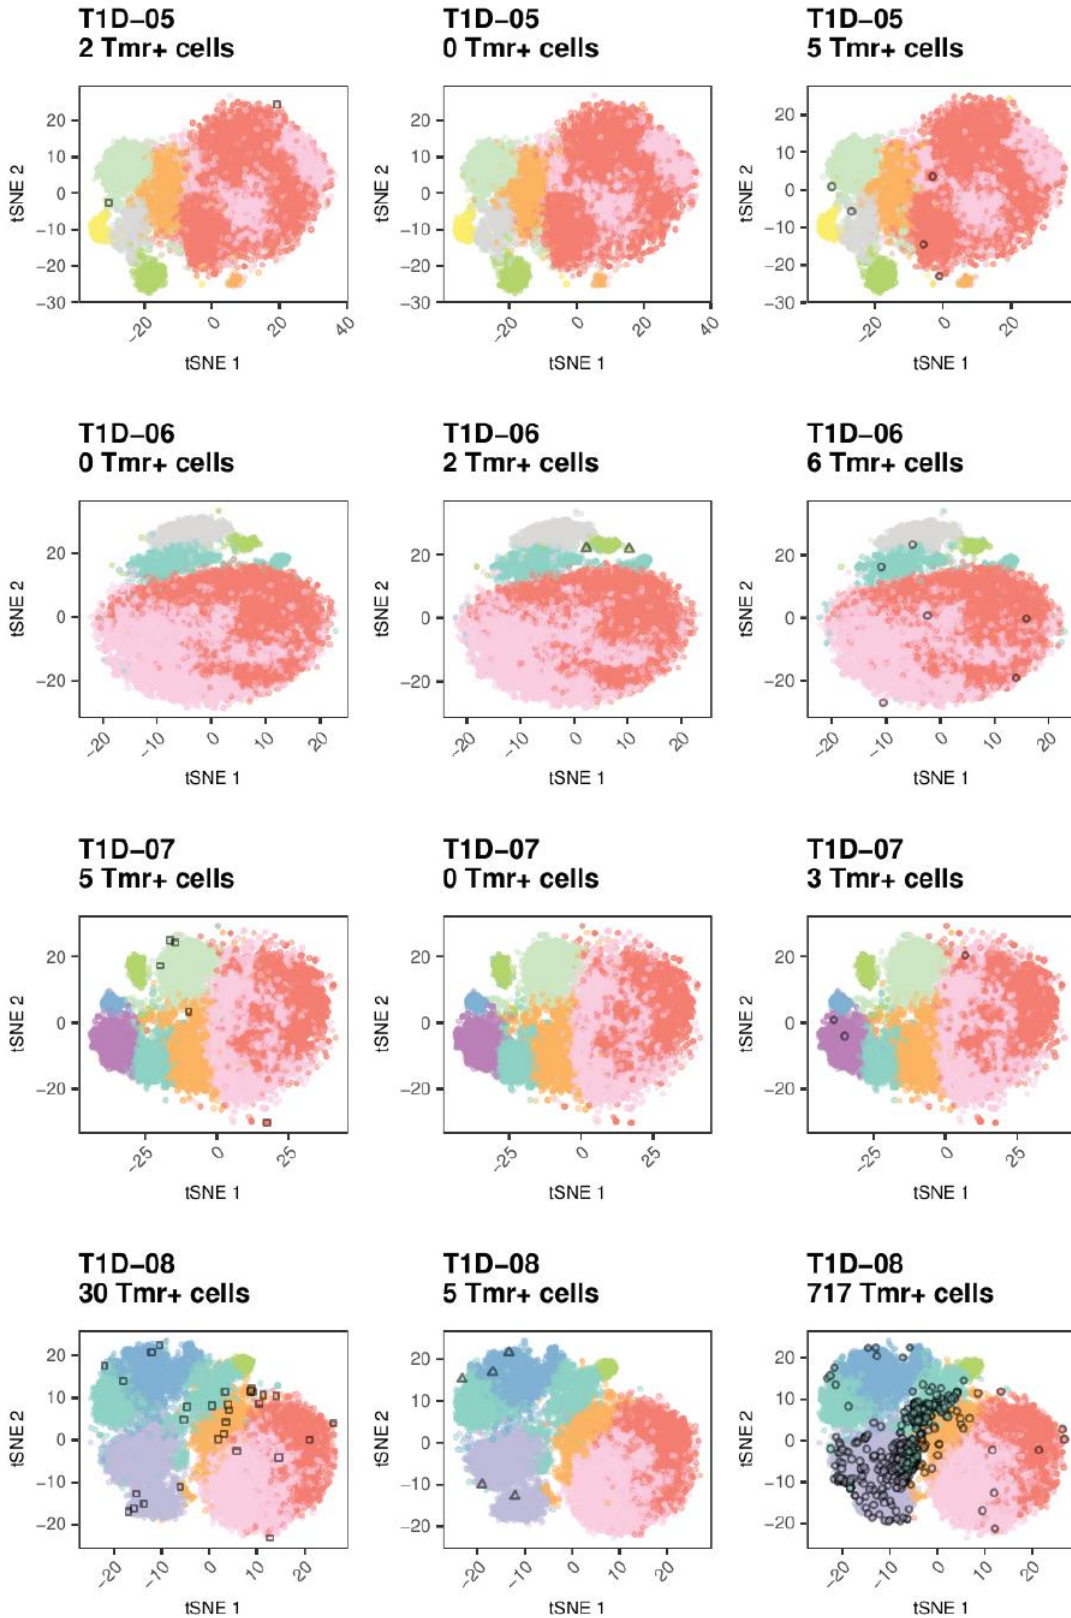



Cluster 1 2 3 4 5 6 7 8 9 10 11 12

□ Islet

▲ Insulin

● Virus

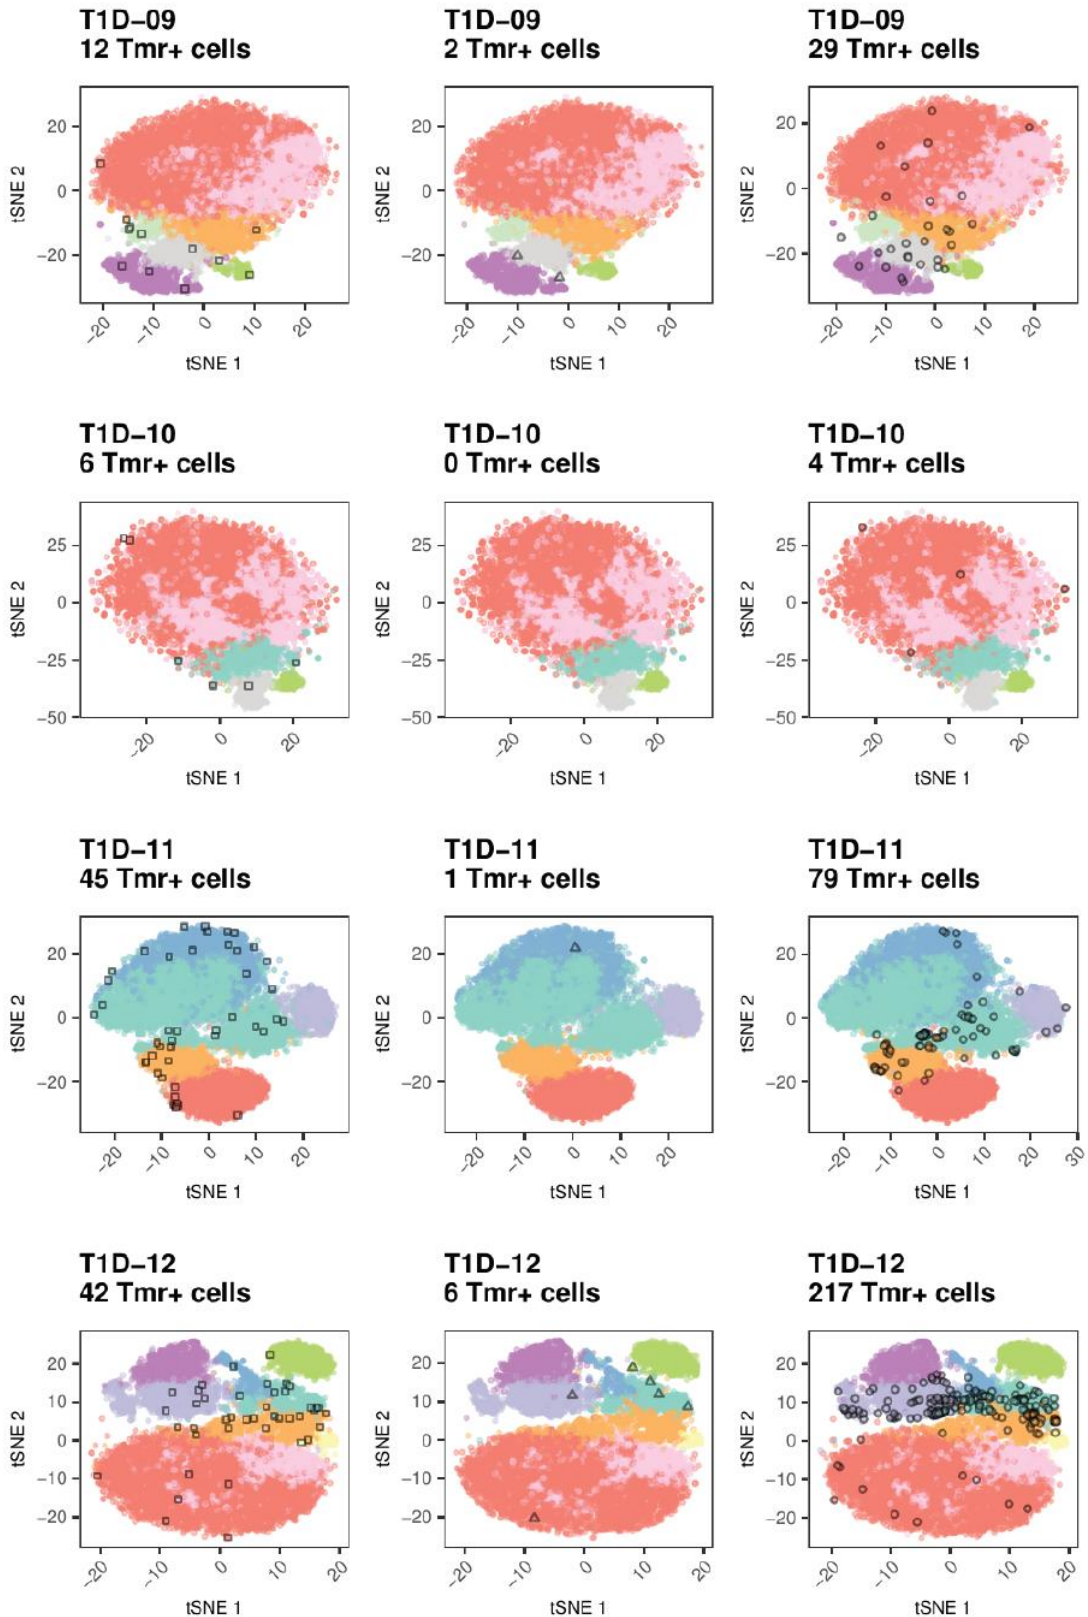

Cluster 1 2 3 4 5 6 7 8 9 10 11 12

□ Islet

▲ Insulin

● Virus

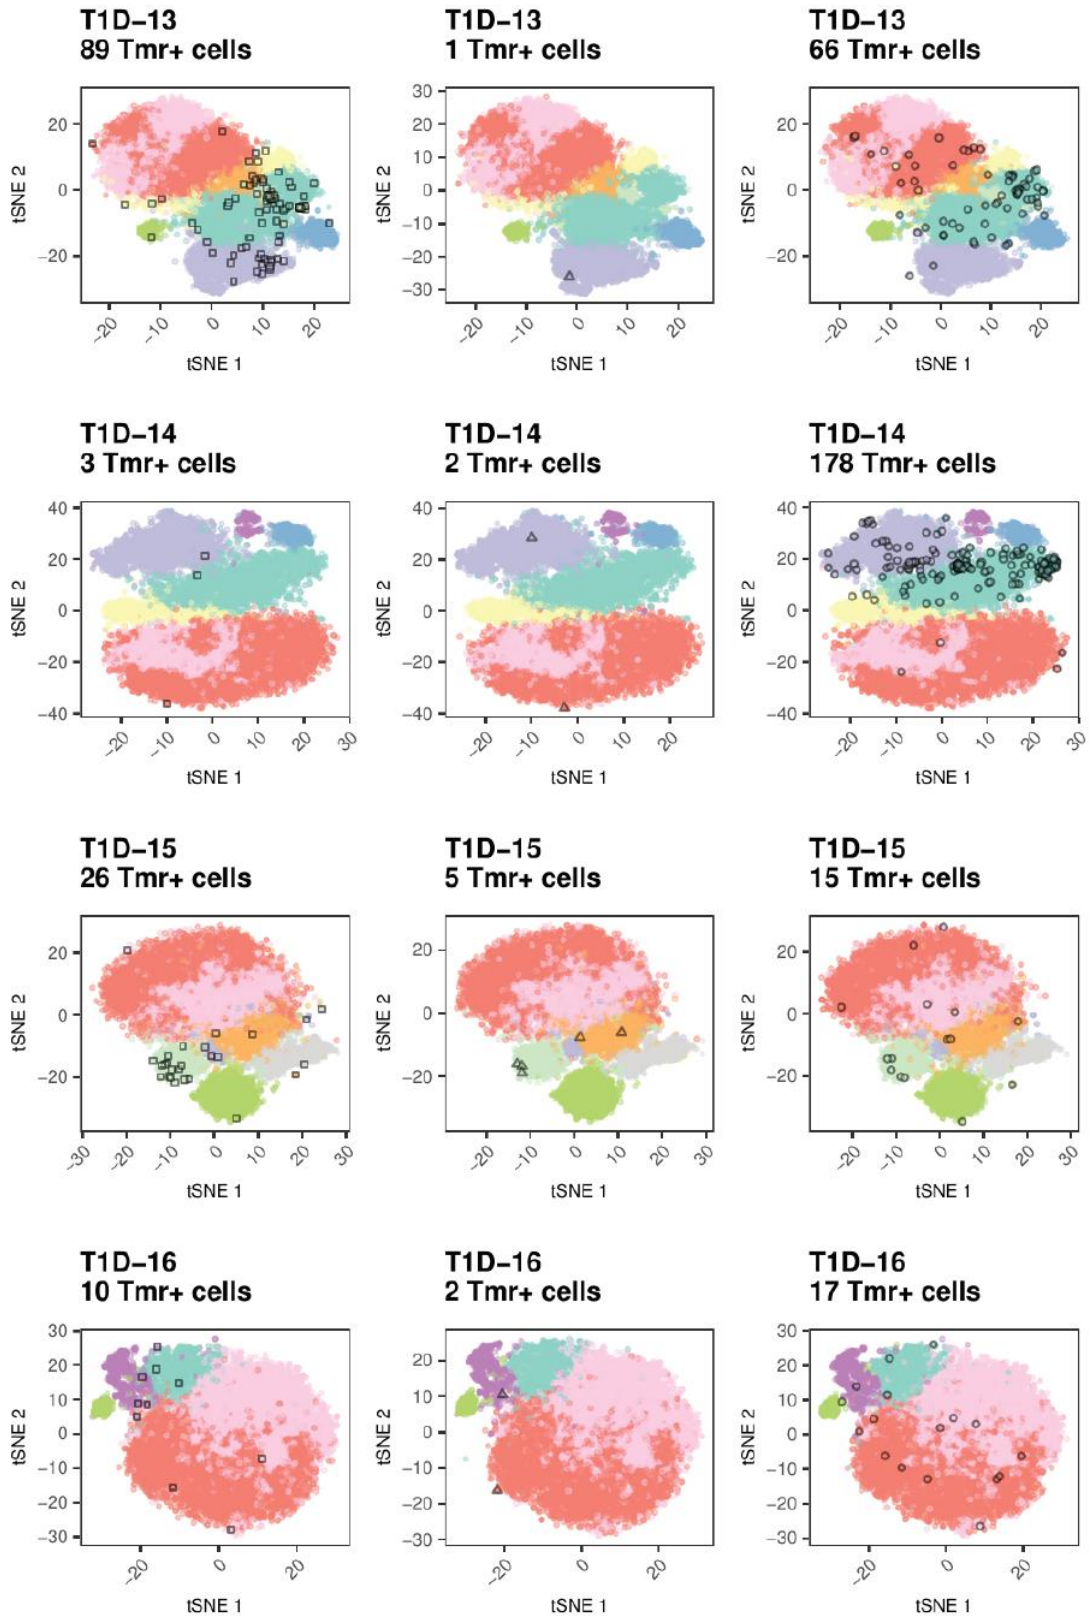

Cluster 1 2 3 4 5 6 7 8 9 10 11 12

□ Islet

▲ Insulin

● Virus

T1D-17  
2 Tmr+ cells

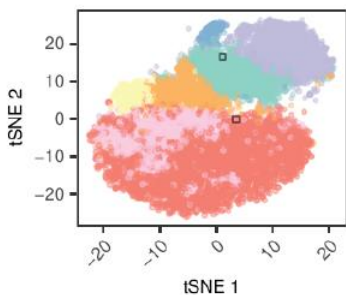

T1D-17  
1 Tmr+ cells

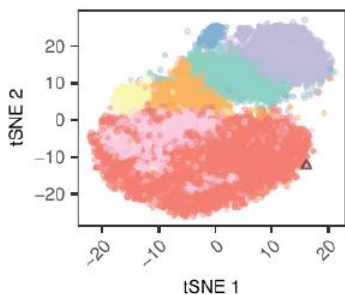

T1D-17  
9 Tmr+ cells

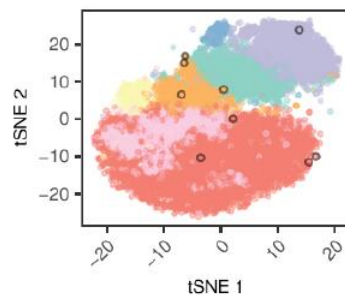

T1D-18  
138 Tmr+ cells

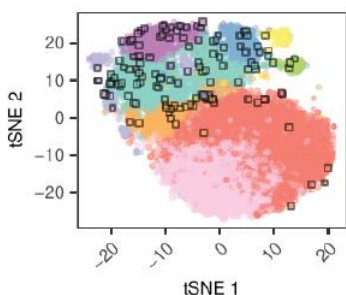

T1D-18  
2 Tmr+ cells

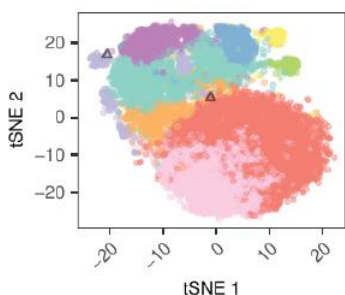

T1D-18  
25 Tmr+ cells

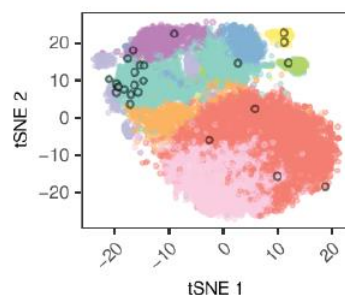

T1D-19  
13 Tmr+ cells

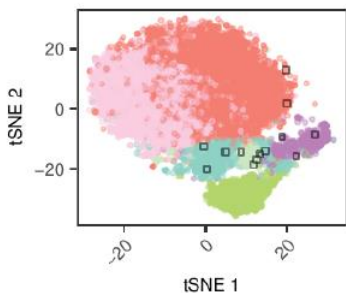

T1D-19  
2 Tmr+ cells

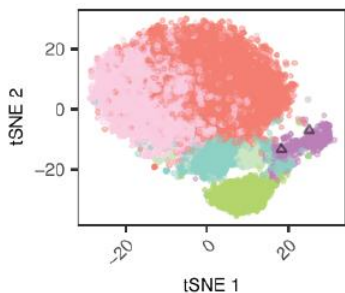

T1D-19  
13 Tmr+ cells

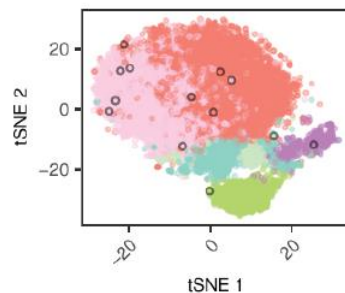

T1D-20  
2 Tmr+ cells

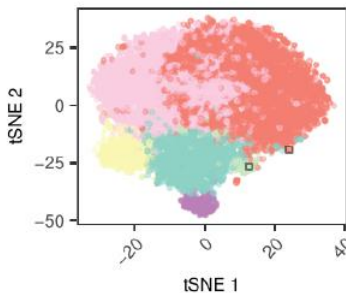

T1D-20  
1 Tmr+ cells

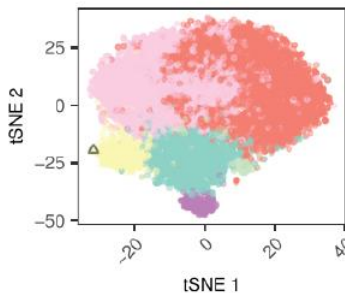

T1D-20  
21 Tmr+ cells

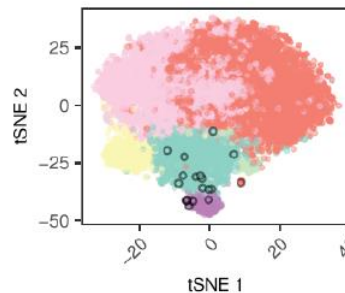



Cluster 1 2 3 4 5 6 7 8 9 10 11 12

□ Islet

▲ Insulin

● Virus

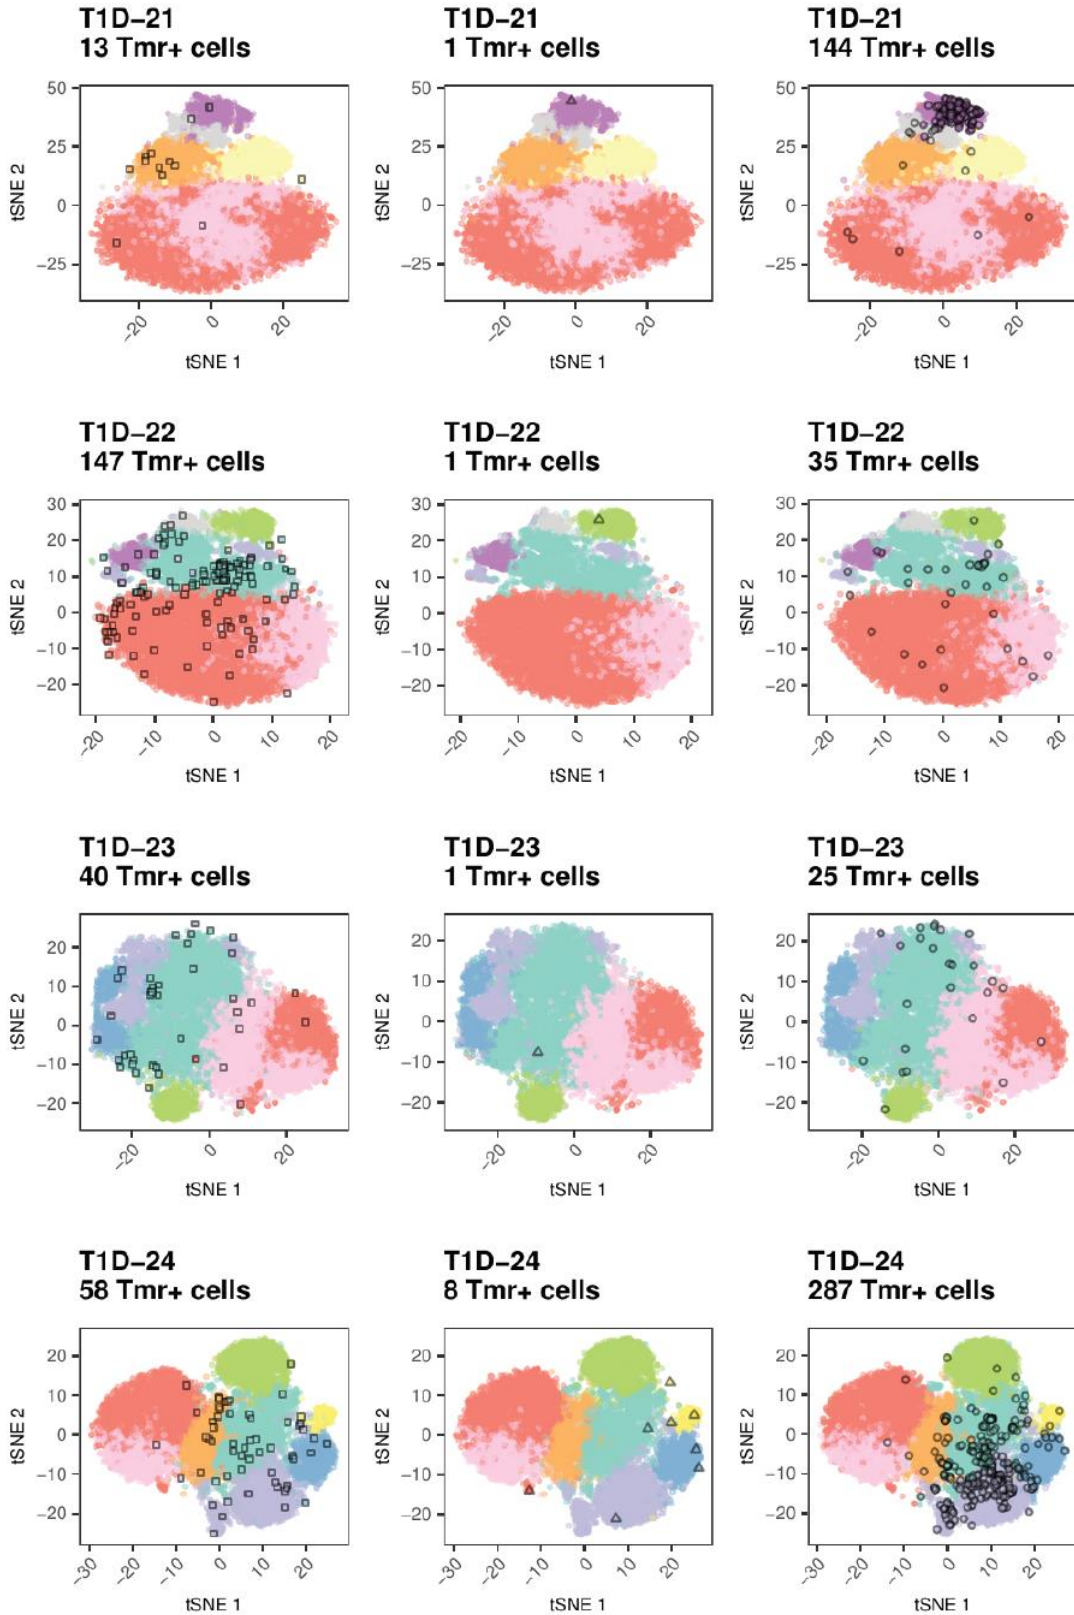

Cluster 1 2 3 4 5 6 7 8 9 10 11 12

□ Islet

▲ Insulin

● Virus

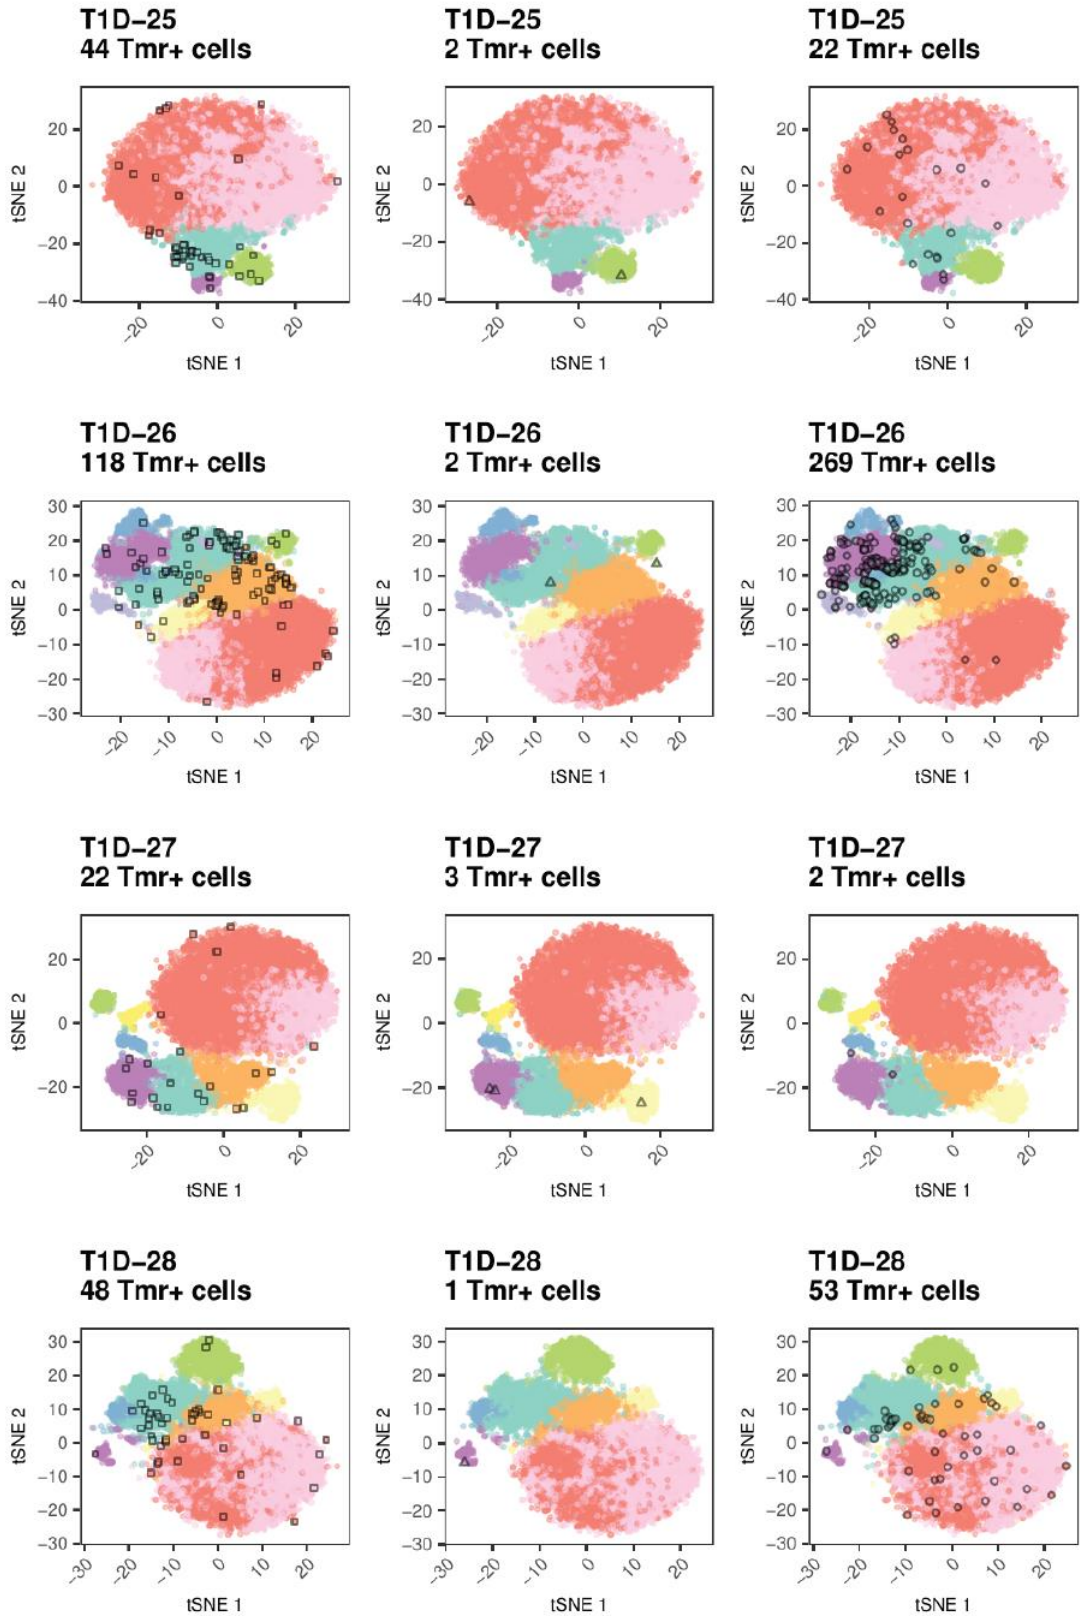

Cluster 1 2 3 4 5 6 7 8 9 10 11 12

□ Islet

▲ Insulin

● Virus

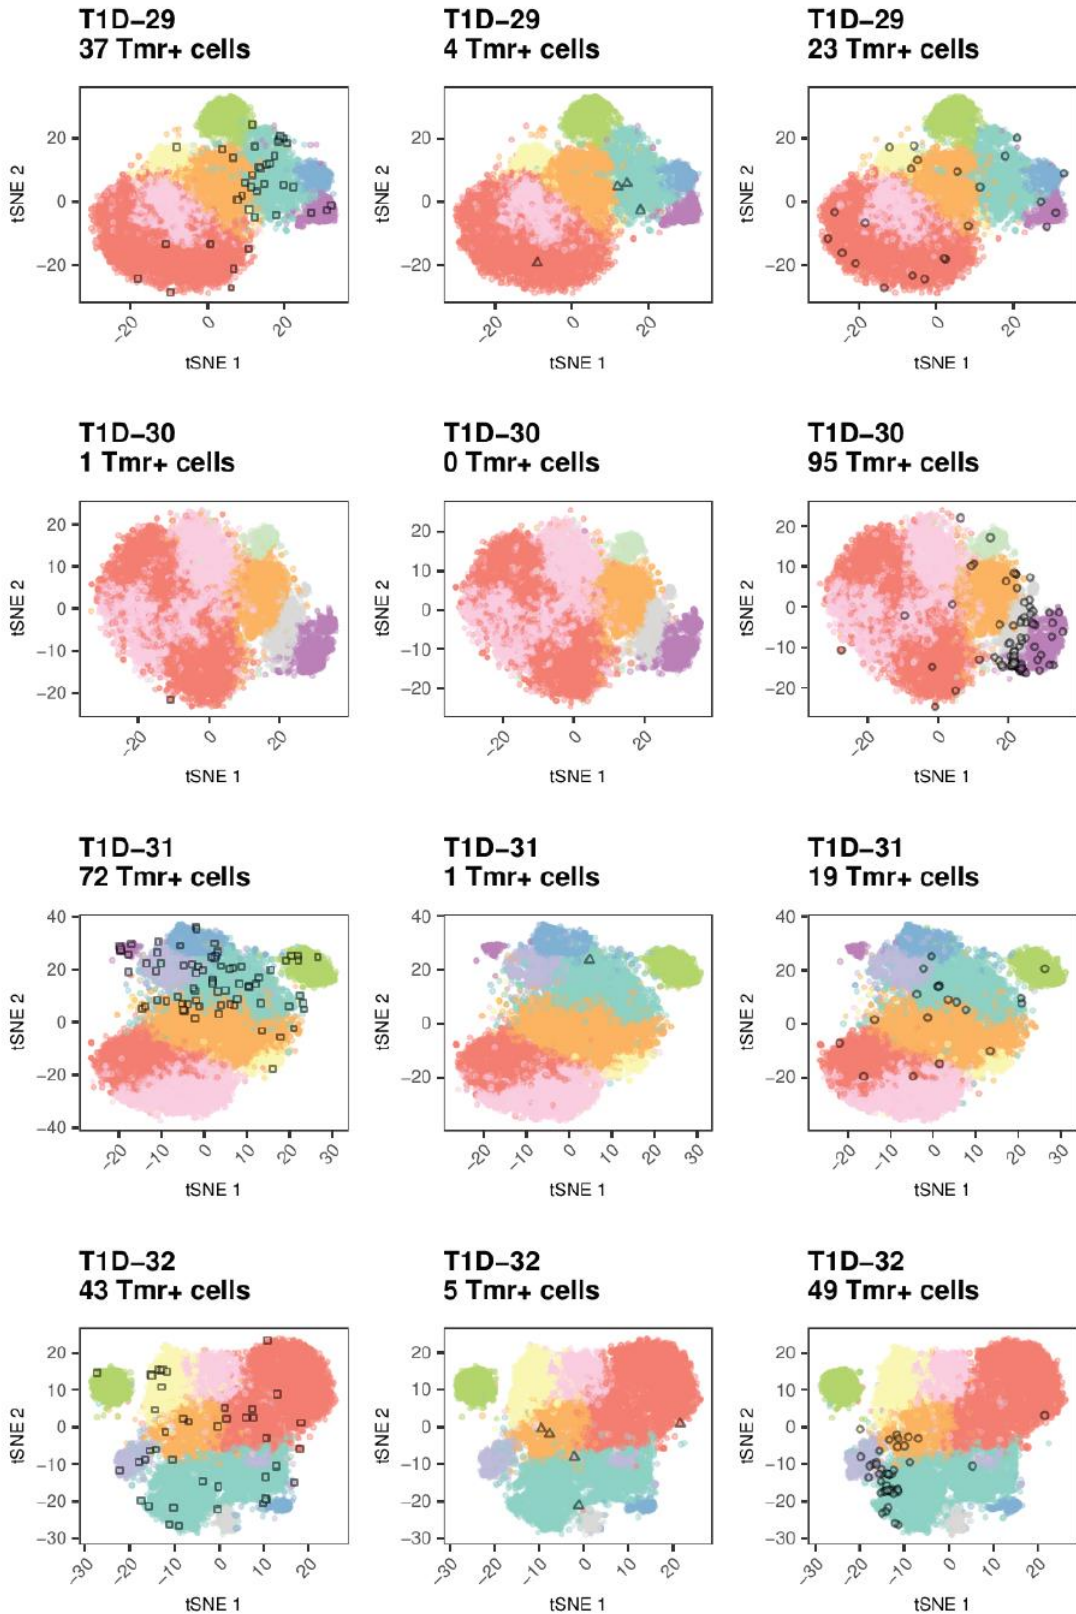



Cluster 1 2 3 4 5 6 7 8 9 10 11 12

□ Islet

▲ Insulin

● Virus

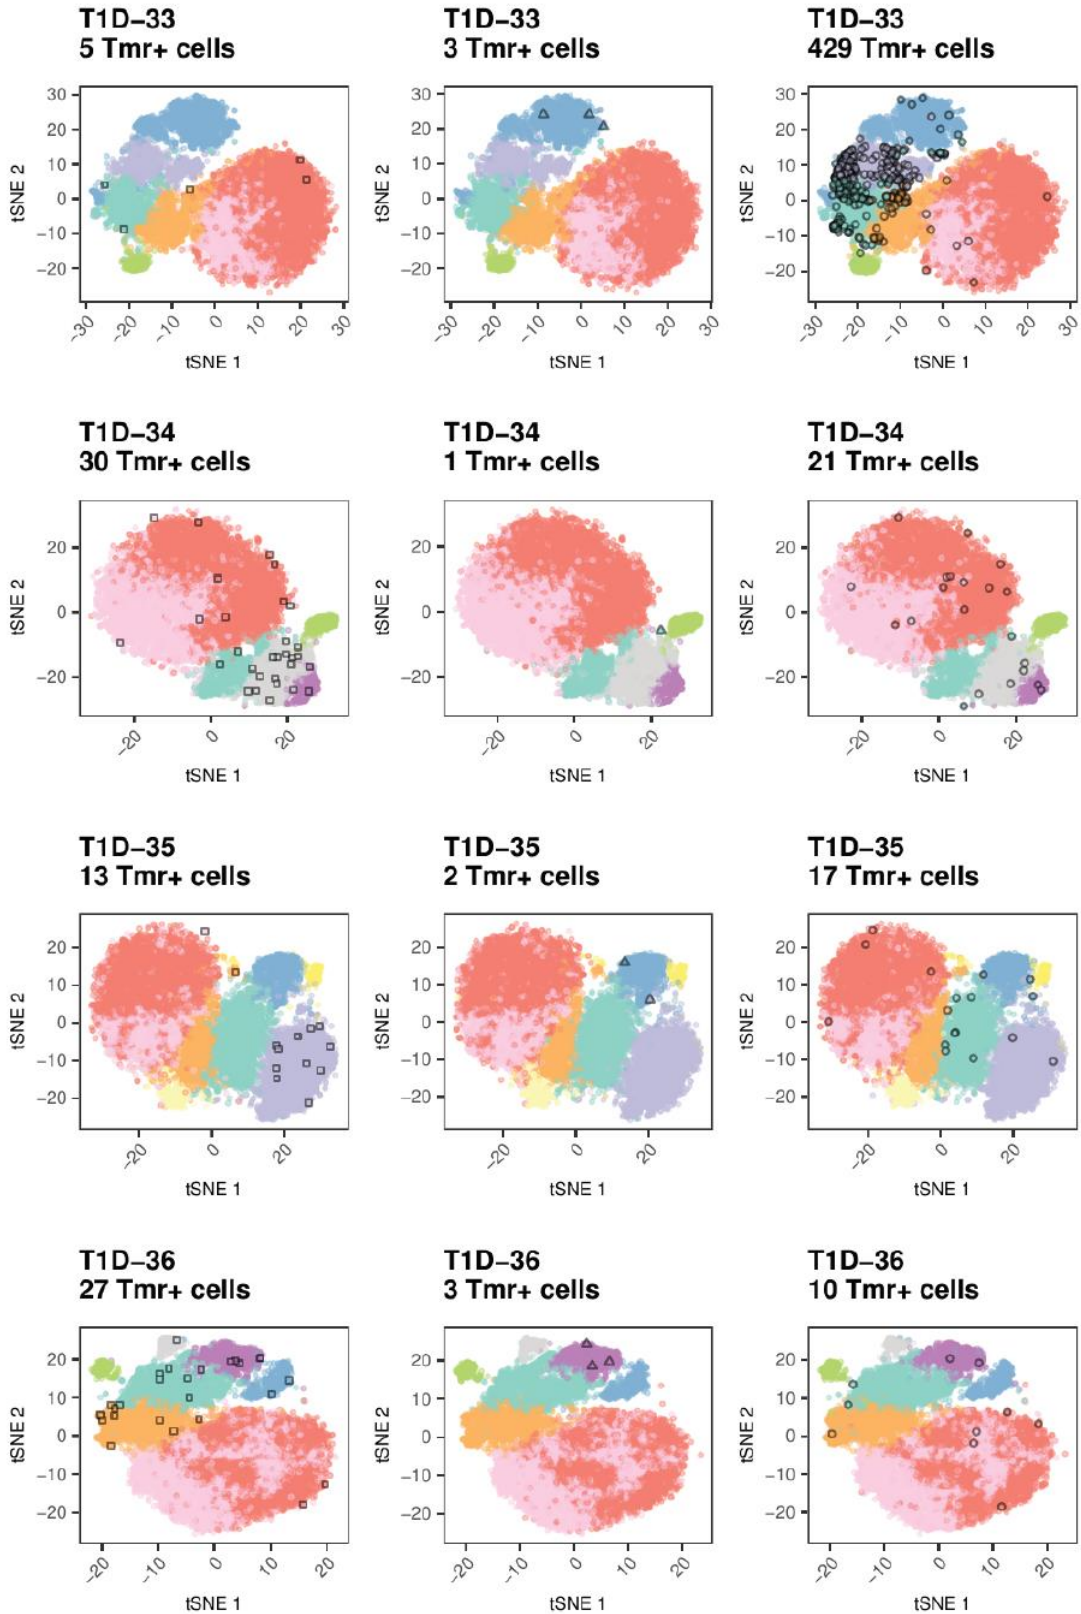



Cluster 1 2 3 4 5 6 7 8 9 10 11 12

□ Islet

▲ Insulin

● Virus

T1D-37  
6 Tmr+ cells

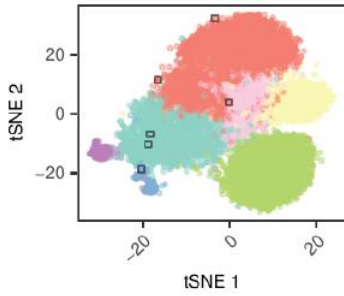

T1D-37  
3 Tmr+ cells

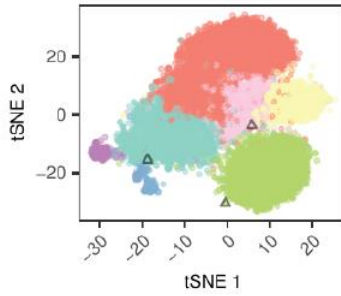

T1D-37  
10 Tmr+ cells

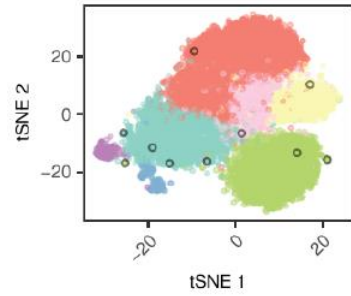

T1D-38  
3 Tmr+ cells

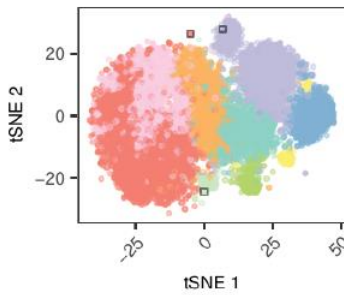

T1D-38  
3 Tmr+ cells

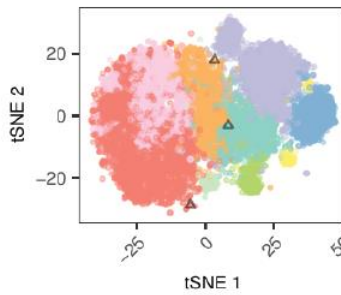

T1D-38  
58 Tmr+ cells

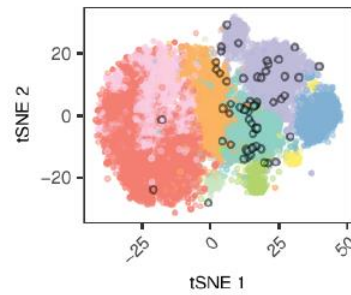

T1D-39  
298 Tmr+ cells

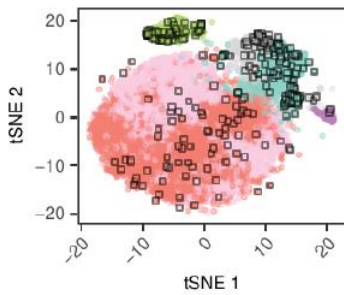

T1D-39  
6 Tmr+ cells

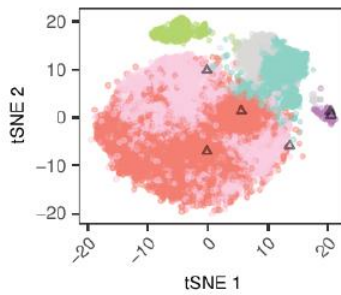

T1D-39  
28 Tmr+ cells

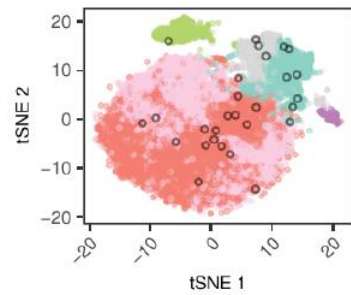

T1D-40  
70 Tmr+ cells

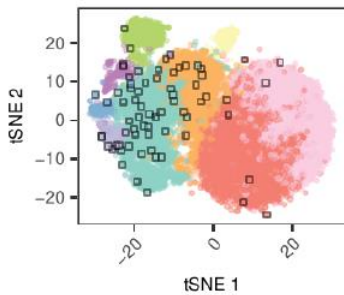

T1D-40  
11 Tmr+ cells

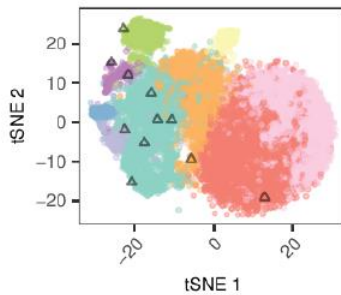

T1D-40  
9 Tmr+ cells

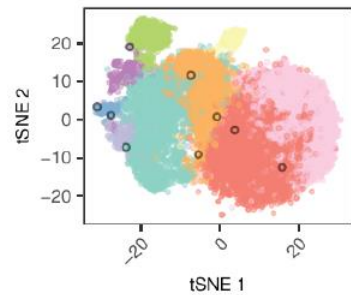

Cluster 1 2 3 4 5 6 7 8 9 10 11 12

□ Islet

▲ Insulin

● Virus

T1D-41  
128 Tmr+ cells

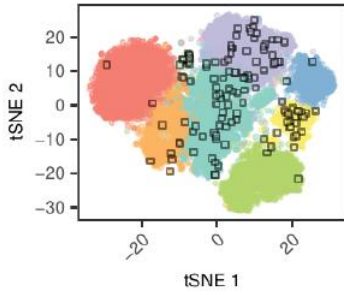

T1D-41  
16 Tmr+ cells

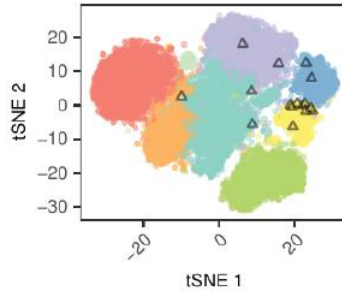

T1D-41  
136 Tmr+ cells

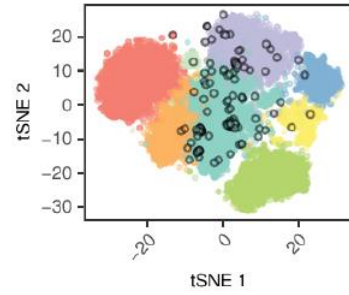

T1D-42  
19 Tmr+ cells

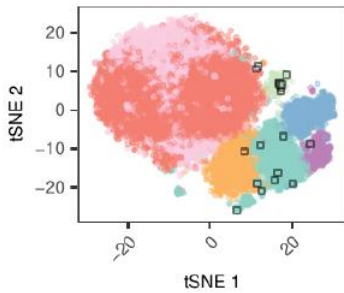

T1D-42  
3 Tmr+ cells

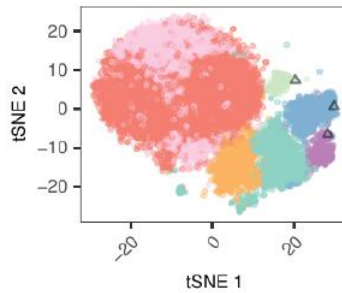

T1D-42  
16 Tmr+ cells

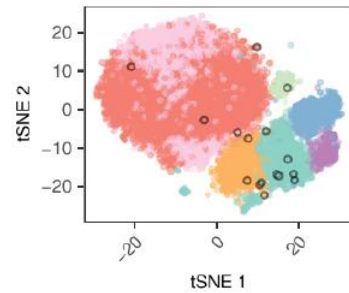

T1D-43  
293 Tmr+ cells

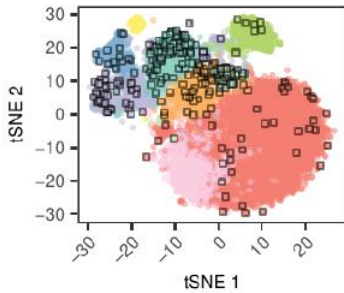

T1D-43  
12 Tmr+ cells

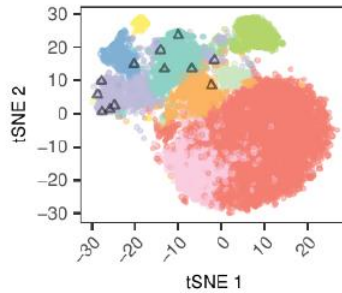

T1D-43  
33 Tmr+ cells

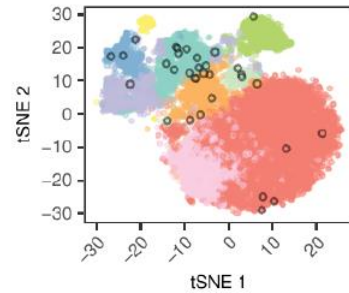

T1D-44  
117 Tmr+ cells

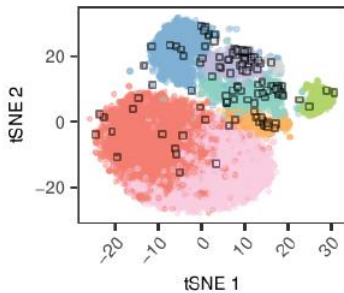

T1D-44  
9 Tmr+ cells

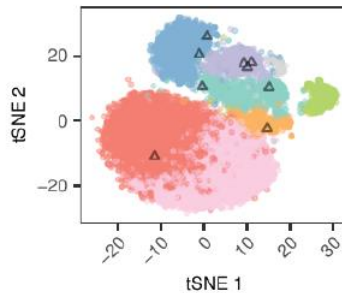

T1D-44  
19 Tmr+ cells

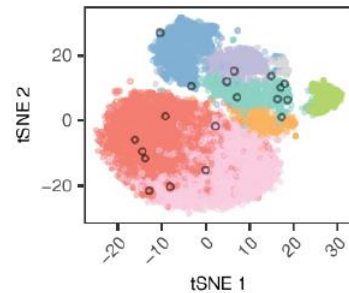

Cluster 1 2 3 4 5 6 7 8 9 10 11 12

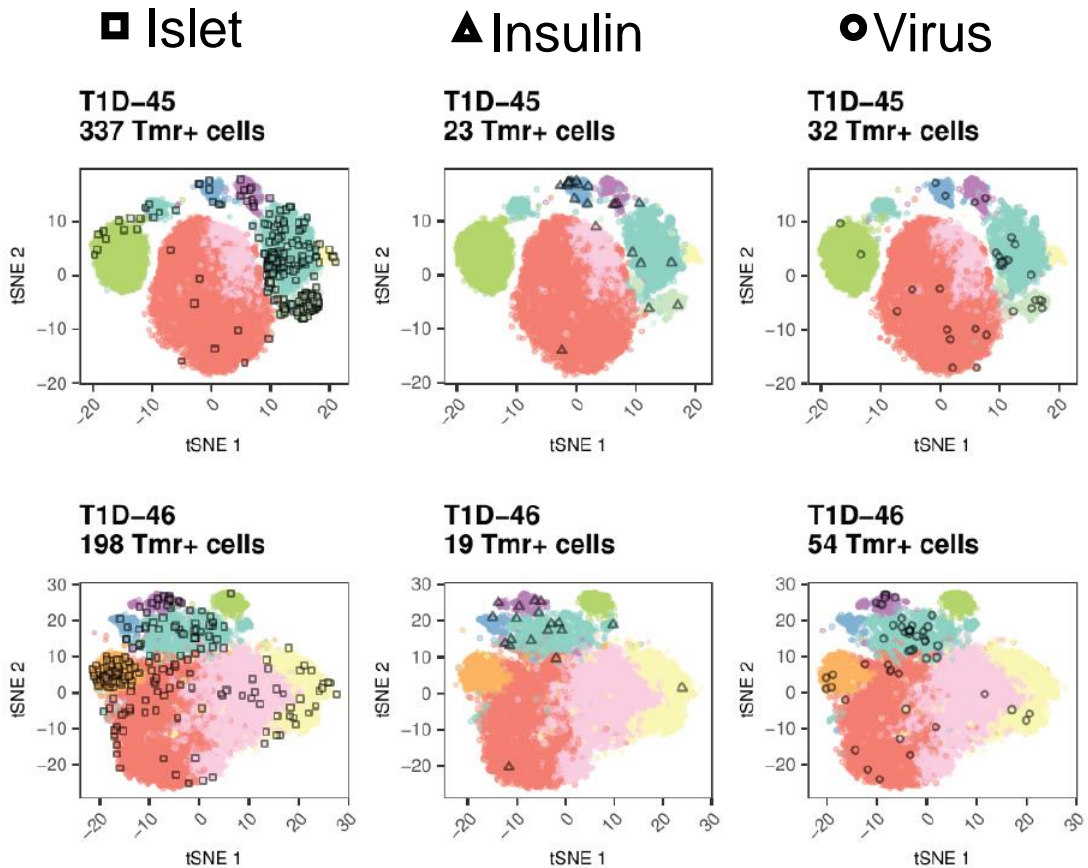

**Supplemental Figure 4. Distribution of antigen-specific CD8<sup>+</sup> T cells across aligned clusters for individual T1D samples.** The DISCOV-R analysis method was applied to total CD8<sup>+</sup> and antigen-specific T cells from T1D subjects (n=46) that were assayed with our Tmr-CyTOF panel. Shown are overlays of antigen-specific CD8<sup>+</sup> T cells (squares, islet-specific; triangles, insulin-specific; circles, virus-specific) on the CD8<sup>+</sup> T cell landscape for each subject, colored by aligned cluster. Clusters 1, 11, and 12 were dominant among islet-specific cells. Tmr<sup>+</sup>, tetramer positive.

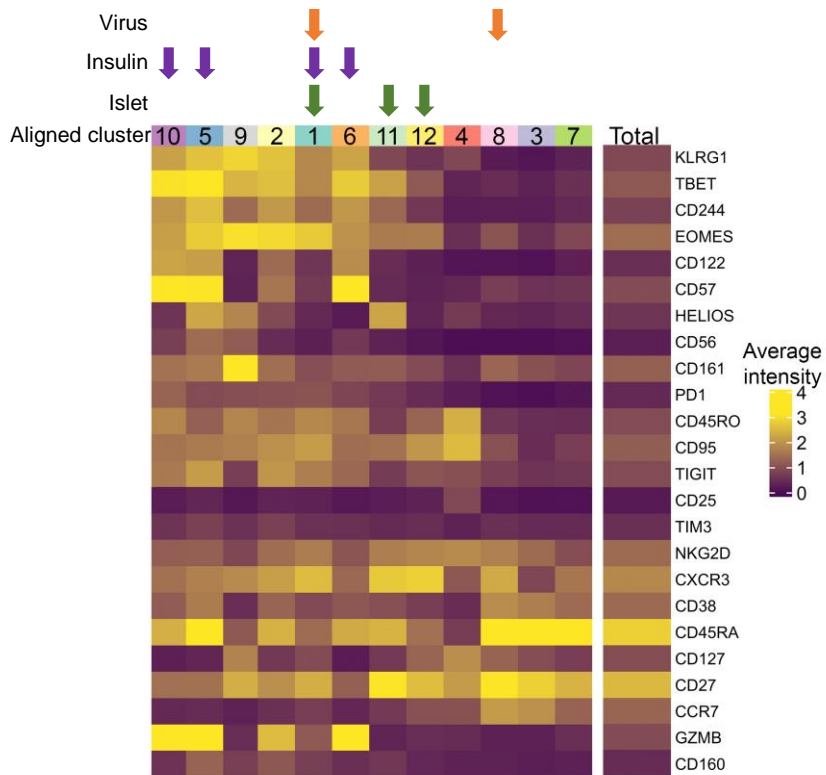

**Supplemental Figure 5. Twelve CD8<sup>+</sup> T cell phenotypes of T1D subjects.** A heatmap of mean absolute arcsinh-transformed expression of 24 markers for the twelve aligned clusters determined in Figure 1 and total CD8<sup>+</sup> T cells from all T1D subjects (n=46). Arrows indicate clusters which were consistently dominant among cells of a particular antigen specificity (orange, virus; purple, insulin; green, islet).



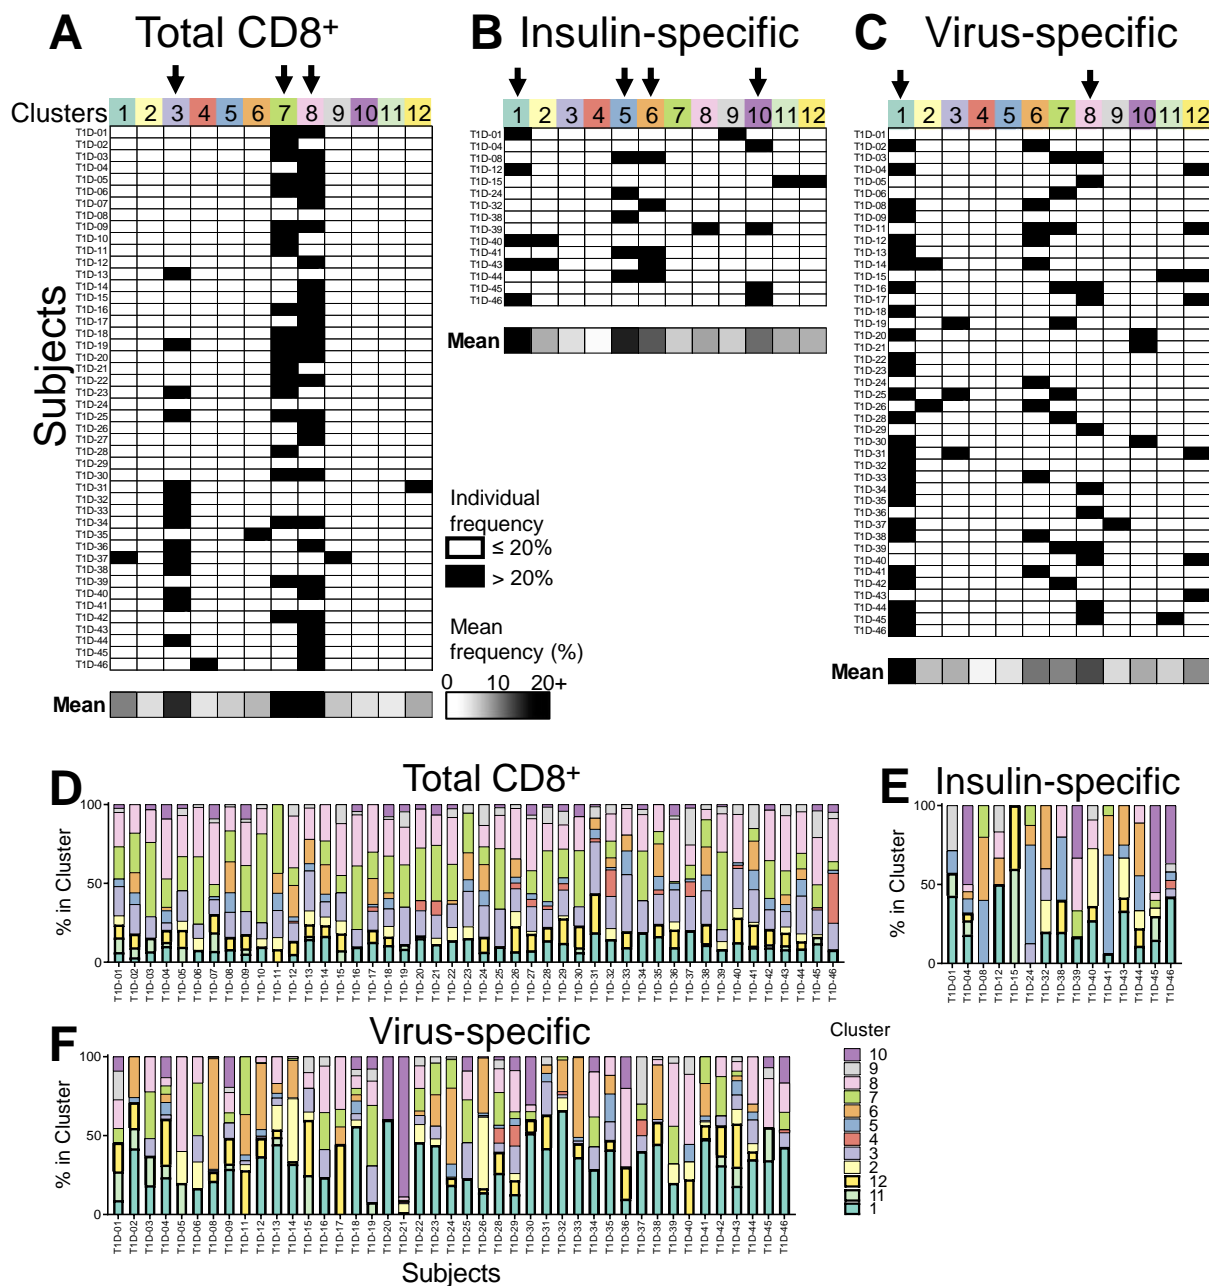

**Supplemental Figure 6. Antigen-specific CD8<sup>+</sup> T cells from T1D subjects comprise multiple distinct phenotypes.** The DISCOV-R analysis method was applied to total CD8<sup>+</sup> and antigen-specific T cells from T1D subjects (n=46) assayed with our Tmr-CyTOF panel. Twelve aligned clusters common across all samples were defined by hierarchical metaclustering. **(A-C)** Clusters comprising more than 20% of cells for an individual are indicated in black for **(A)** total CD8<sup>+</sup> T cells (n=46), and subjects with at least 5 Tmr<sup>+</sup> cells among **(B)** insulin-specific cells (n=15) and **(C)** virus-specific cells (n=43). Arrows indicate clusters predominant in at least 25% of samples; the detached bottom row indicates the mean frequency of cells within a cluster for all individuals on a scale from 0% (white) to 20%+ (black). **(D-F)** The percent of each of the twelve clusters were assessed for **(D)** total CD8<sup>+</sup> T cells (n=46), and subjects with at least 5 Tmr<sup>+</sup> cells among **(E)** insulin-specific cells (n=15) and **(F)** virus-specific cells (n=43). The 3 clusters that are most dominant among islet-specific cells across subjects (clusters 1, 11, and 12) have heavy outline and are stacked at the bottom. Tmr, tetramer.

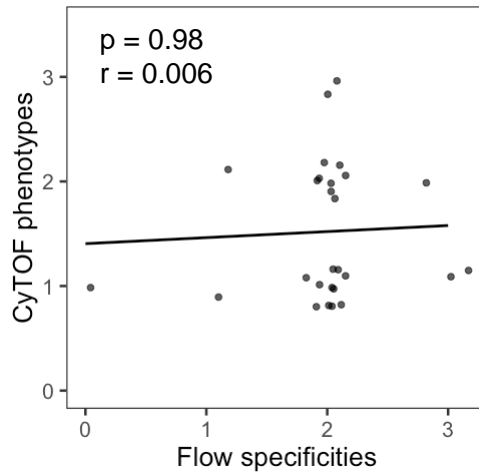

**Supplemental Figure 7. The number of predominant phenotypes of islet-specific CD8<sup>+</sup> T cells does not correlate with the number of positive islet antigen specificities.** A subset of the T1D subjects (n = 27) that were analyzed by the DISCOV-R method were also assayed by flow cytometry for frequency of CD8<sup>+</sup> T cells specific for individual epitopes (PPI, GAD, and IGRP) separately. The number predominantly occupied clusters (phenotypes comprising >20% of islet-specific cells) determined by DISCOV-R plotted against the number of positive (>0.02%) islet antigen specificities determined by flow cytometry. Jitter was added to visualize stacked points. Statistical significance was determined by Spearman correlation.

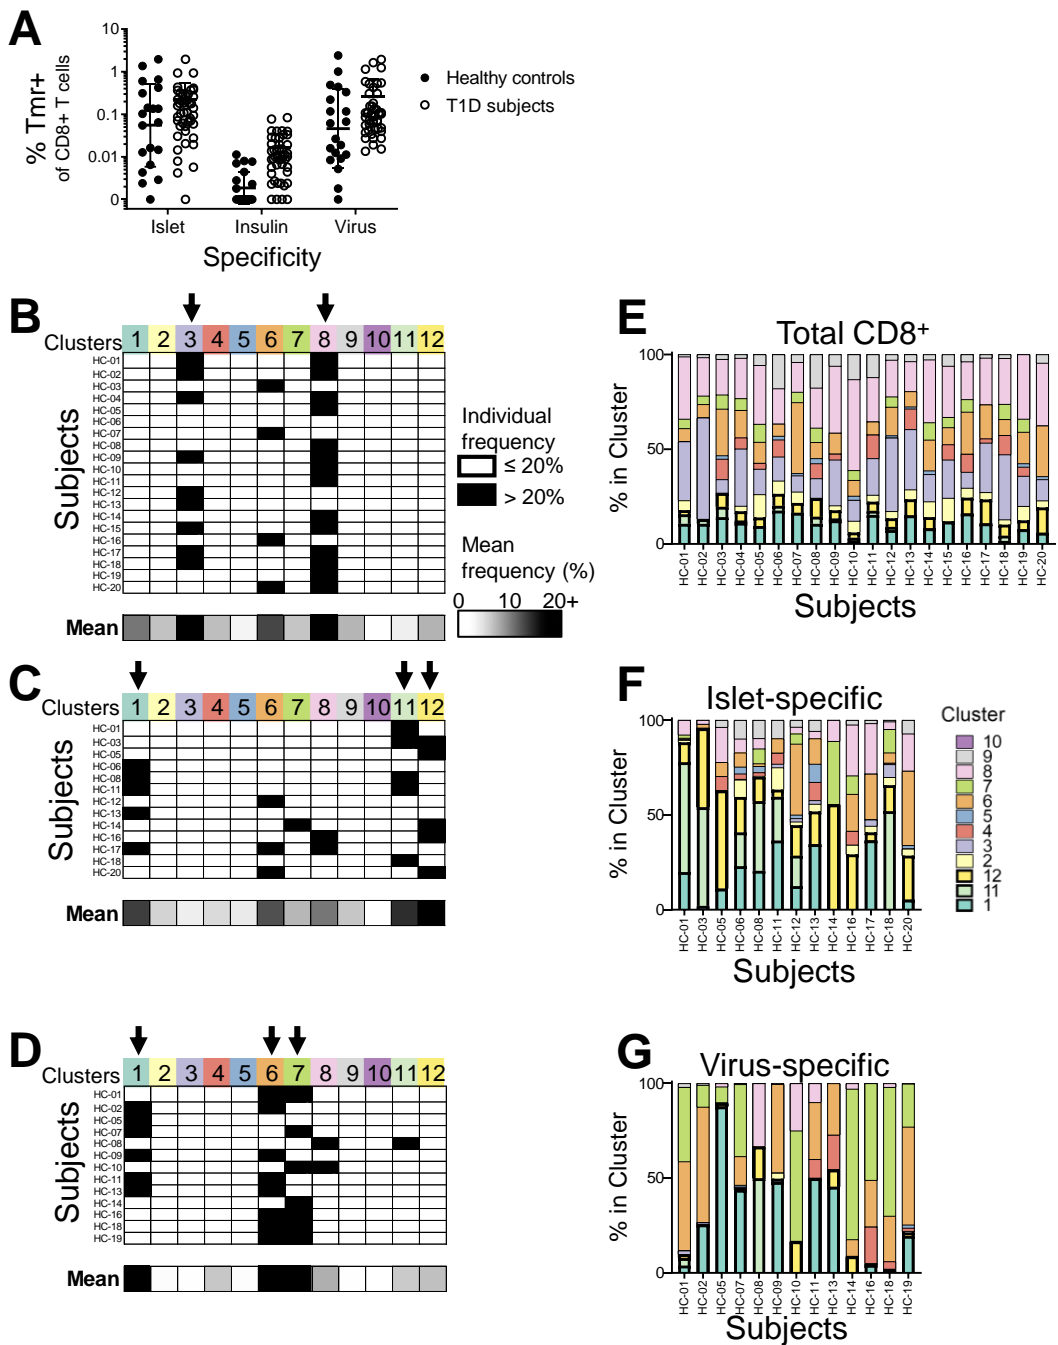

**Supplemental Figure 8. Antigen-specific CD8<sup>+</sup> T cell frequency and islet-specific cell phenotype do not differ between healthy controls and T1D subjects.** Healthy controls (n=20) were assayed with our Tmr-CyTOF panel and included in the DISCOV-R analysis as in Figure 1. **(A)** Frequencies of antigen-specific (Tmr<sup>+</sup>) within total CD8<sup>+</sup> T cells among healthy controls (n=20) and T1D subjects (n=46) was compared using a two-way ANOVA with Sidak test for multiple comparisons. **(B-D)** Clusters comprising more than 20% of cells for an individual are indicated in black for **(B)** total CD8<sup>+</sup> T cells (n=20), and individuals with at least 5 Tmr<sup>+</sup> cells among **(C)** islet-specific cells (n=13) and **(D)** virus-specific cells (n=13). Arrows indicate clusters predominant in at least 25% of samples; the detached bottom row indicates the mean frequency of cells within a cluster for all individuals on a scale from 0% (white) to 20%+ (black). **(E-G)** The percent of each of the twelve clusters were assessed for **(E)** total CD8<sup>+</sup> T cells (n=20), and subjects with at least 5 Tmr<sup>+</sup> cells among **(F)** insulin-specific cells (n=13) and **(G)** virus-specific cells (n=13). The 3 clusters that are most dominant among islet-specific cells across subjects (clusters 1, 11, and 12) have heavy outline and are stacked at the bottom. Tmr, tetramer.

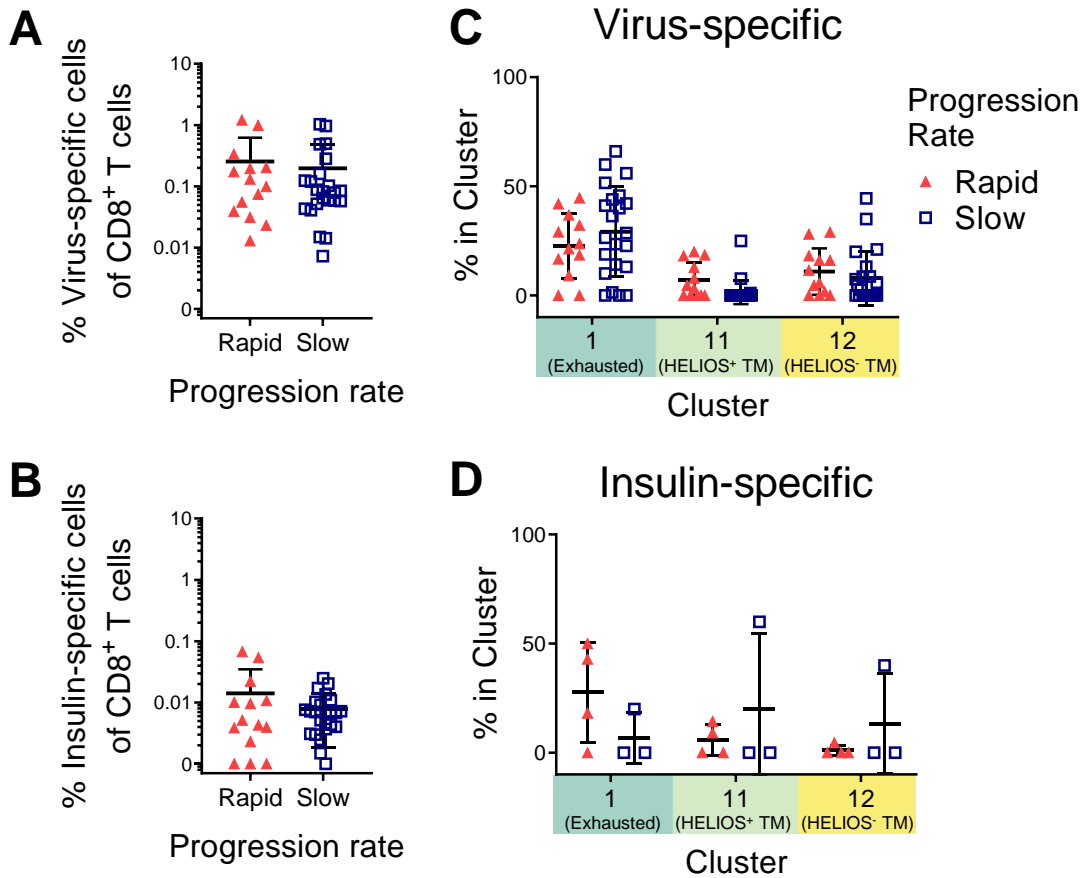

**Supplemental Figure 9. Virus- and insulin-specific CD8<sup>+</sup> T cell frequencies and phenotypes do not differ by rate of disease progression.** Frequency of **(A)** virus- or **(B)** insulin-specific cells among CD8<sup>+</sup> T cells was assessed for rapid (n=14) and slow (n=23) T1D progressors using a Mann-Whitney test. Frequency the three common islet-specific clusters was assessed for rapid and slow T1D progressors with five or more Tmr<sup>+</sup> events using a two-way ANOVA with Sidak test for multiple comparisons among **(C)** virus- (n=12 rapid, n=22 slow) or **(D)** insulin-specific (n= 4 rapid, n=3 slow) CD8<sup>+</sup> T cells. Black horizontal lines with error bars represent mean  $\pm$  SD. Tmr, tetramer; TM, transitional memory.



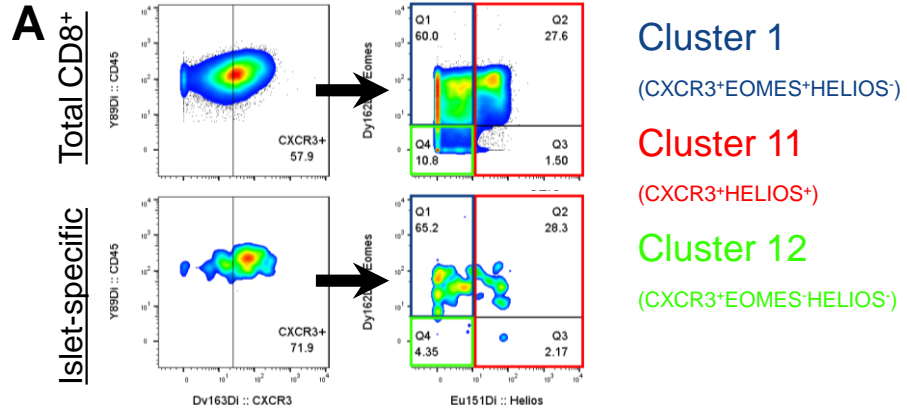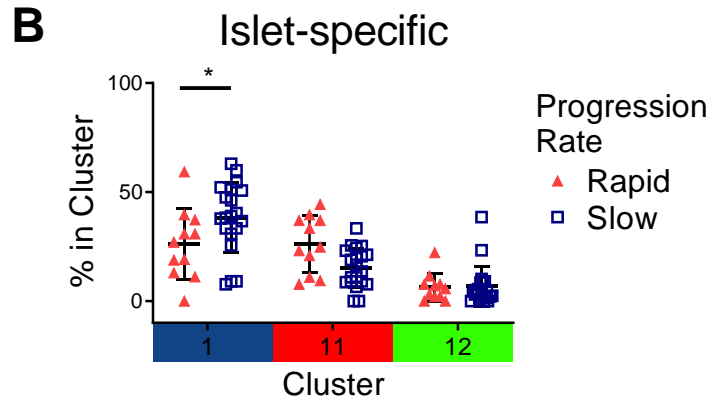

**Supplemental Figure 10. Frequency of manually-gated islet-specific phenotypes is associated with rate of disease progression.** T1D samples were manually gated for a small number of selected markers that distinguished clusters 1 (CXCR3<sup>+</sup>HELIOS<sup>-</sup>EOMES<sup>+</sup>), 11 (CXCR3<sup>+</sup>HELIOS<sup>+</sup>), and 12 (CXCR3<sup>+</sup>EOMES<sup>-</sup>HELIOS<sup>-</sup>). **(A)** Representative gating strategy for one individual (T1D-41). **(B)** Frequency of islet-specific CD8<sup>+</sup> T cells among the three manually gated populations for rapid (n=11) and slow (n=20) T1D progressors with 5 or more Tmr<sup>+</sup> events. Statistical comparisons were made using a two-way ANOVA with Sidak test for multiple comparisons. Black horizontal lines with error bars represent mean ± SD. Tmr, tetramer; \*, p<0.05.

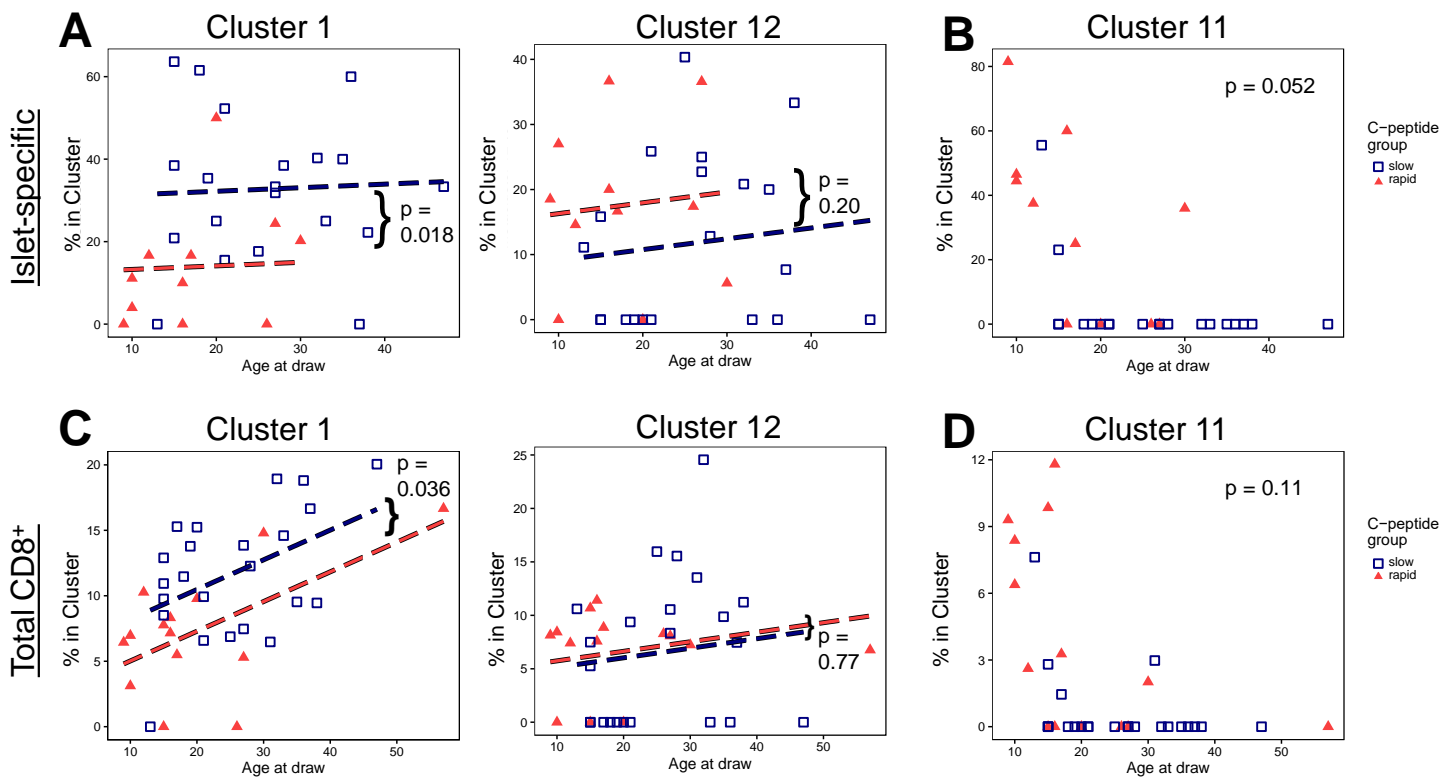

**Supplemental Figure 11. Differential phenotypes of islet-specific and total CD8<sup>+</sup> T cells in rapid and slow progressors remain after accounting for age.** Lines show best-fit models for rapid and slow progression groups, using a common slope for (A & B) islet-specific and (C & D) total CD8<sup>+</sup> T cells. Significance values shown are for differences between groups in a (A & C) linear or (B & D) logistic model with age at draw as a covariate. Interaction terms for age x group were not significant for all but islet-specific cells in cluster 11 and were not included in any of the final models.

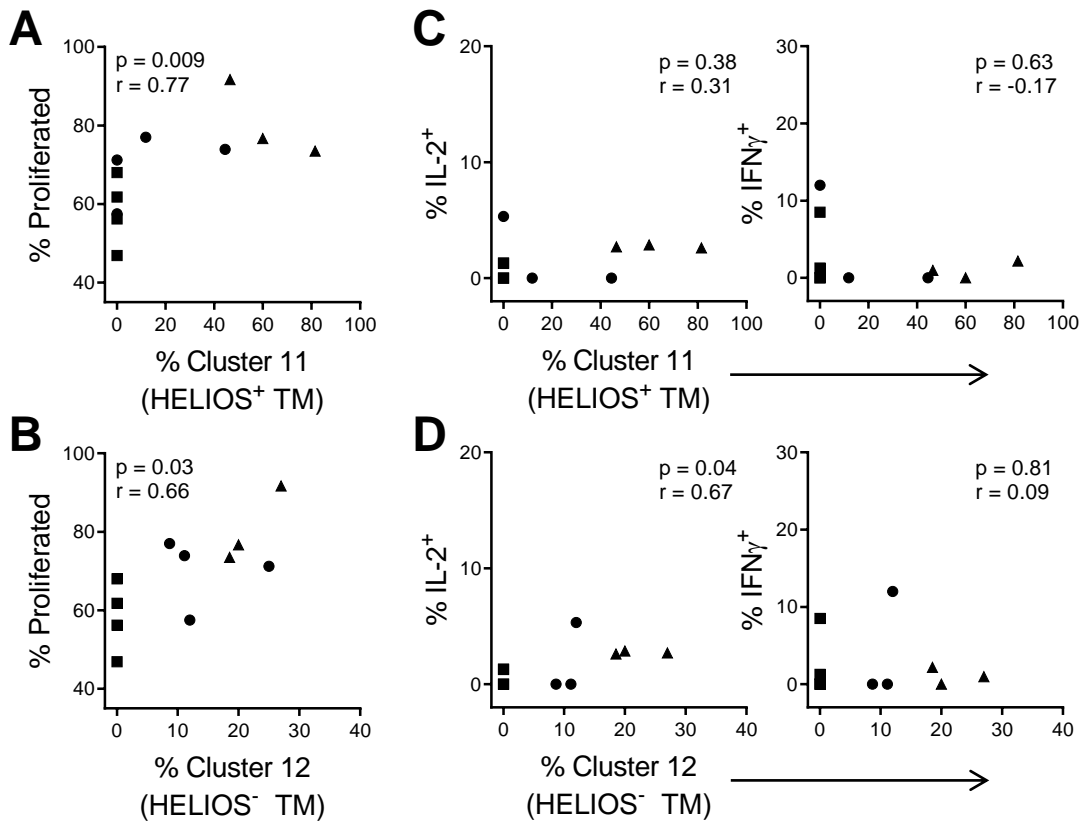

**Supplemental Figure 12. Islet-specific CD8<sup>+</sup> T cells with abundant cluster 11 or 12 phenotype are hyperproliferative but produce limited levels of cytokines, IL-2 and IFN- $\gamma$ .** PBMC from T1D subjects ( $n=11$ ) with varying frequencies of cluster 11 or 12 among their islet-specific cells were stimulated with anti-CD3 plus anti-CD28. Cells were assayed by flow cytometry to identify islet-specific (Tmr<sup>+</sup>) CD8<sup>+</sup> T cells (Supplemental Figure 13). Frequency of proliferated cells among islet Tmr<sup>+</sup> cells after 5 days of stimulation, plotted against frequency of **(A)** cluster 11 or **(B)** cluster 12 determined by mass cytometry for each individual ( $n=11$ ). Frequency of IL-2 and IFN- $\gamma$  positive cells among islet Tmr<sup>+</sup> cells after 6 hours of stimulation, plotted against frequency of **(C)** cluster 11 or **(D)** cluster 12 determined by mass cytometry for each individual ( $n=10$ ); no substantial cytokine production (<1%) was observed in the absence of stimulation. Statistical significance was determined by Spearman correlation. Tmr, tetramer; TM, transitional memory.

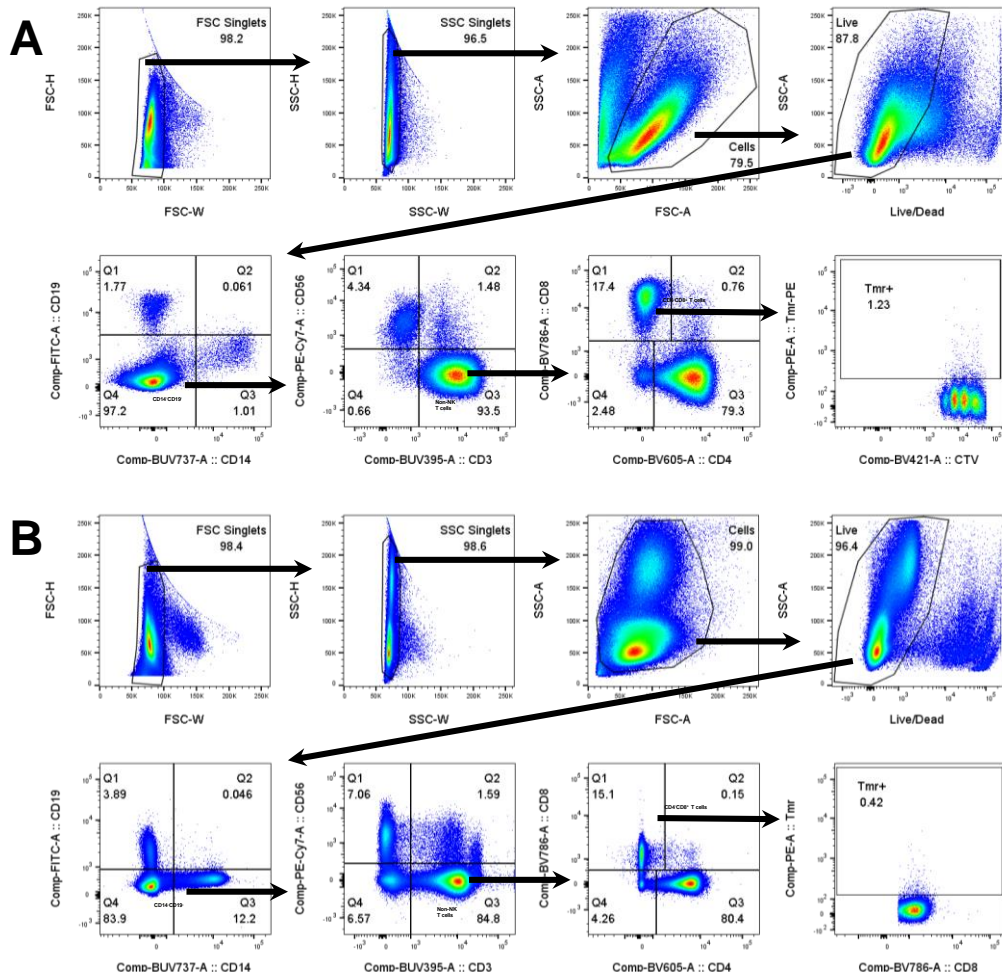

**Supplemental Figure 13. Gating strategy to identify islet-specific CD8<sup>+</sup> T cells using flow cytometry panels.** Cells from one representative individual (T1D-34) after stimulation with anti-CD3 plus anti-CD28 were gated for singlet live CD14<sup>-</sup>CD19<sup>-</sup>CD56<sup>+</sup>CD3<sup>+</sup>CD4<sup>+</sup>CD8<sup>+</sup> (CD8<sup>+</sup> T cells) that were positive for pooled islet Tmr using the (A) proliferation panel or (B) cytokine panel. Tmr<sup>+</sup> gating was guided by HLA-A2 negative and PPI-specific CD8<sup>+</sup> T cell clone-spiked control samples. The same gates were applied to stimulated and unstimulated samples from the same subject. Tmr, tetramer; CTV, cell trace violet.



**Supplemental Table 1. Antigen-specific CD8<sup>+</sup> T cell mass cytometry phenotyping panel.**

| Mass    | Target                | Clone    | Supplier           | Cocktail      |
|---------|-----------------------|----------|--------------------|---------------|
| 89      | CD45                  | HI30     | Fluidigm           | Surface       |
| 141     | CD45RO                | UCHL1    | Biolegend*         | Surface       |
| 142     | CD57                  | HCD57    | Fluidigm           | Surface       |
| 143     | CD45RA                | HI100    | Fluidigm           | Surface       |
| 144     | CD38                  | HIT2     | Fluidigm           | Surface       |
| 145     | CD8                   | RPA-T8   | Biolegend*         | Surface       |
| 146     | CD4                   | RPA-T4   | Biolegend*         | Surface       |
| 147     | KLRG1                 | 14C2A07  | Biolegend*         | Surface       |
| 148     | CD14                  | RMO52    | Fluidigm           | Surface       |
| 149     | CD127                 | A019D5   | Fluidigm           | Surface       |
| 151     | Helios                | 22F6     | Biolegend*         | Intracellular |
| 152     | CD160                 | BY55     | Biolegend*         | Surface       |
| 153     | Tim3                  | F382E2   | Fluidigm           | Surface       |
| 154     | CD3                   | UCHT1    | Fluidigm           | Surface       |
| 155     | TIGIT                 | MBSA43   | eBioscience*       | Surface       |
| 156     | CD25                  | M-A251   | Biolegend*         | Surface       |
| 158     | CD27                  | L128     | Fluidigm           | Surface       |
| 159     | CD161                 | HP3G10   | Fluidigm           | Surface       |
| 160     | Tbet                  | 4B10     | Fluidigm           | Intracellular |
| 162     | Eomes                 | WD1928   | eBioscience*       | Intracellular |
| 163     | CXCR3                 | G025H7   | Fluidigm           | Surface       |
| 164     | CD95                  | DX2      | Fluidigm           | Surface       |
| 165     | CD19                  | HIB19    | Fluidigm           | Surface       |
| 166     | NKG2D                 | ON72     | Fluidigm           | Surface       |
| 167     | CCR7                  | G043H7   | Fluidigm           | Surface       |
| 168     | Tmr                   | --       | --                 | Tetramer      |
| 169     | Tmr                   | --       | --                 | Tetramer      |
| 170     | CD122                 | Tu27     | Fluidigm           | Surface       |
| 171     | Granzyme B            | GB11     | Fluidigm           | Intracellular |
| 173     | 2B4                   | C1.7     | Biolegend*         | Surface       |
| 174     | Tmr                   | --       | --                 | Tetramer      |
| 175     | PD1                   | EH12.2H7 | Fluidigm           | Surface       |
| 176     | CD56                  | NCAM16.2 | Fluidigm           | Surface       |
| 191/193 | Iridium (cell size)   | --       | Fluidigm           | Iridium       |
| 194-198 | Cisplatin (viability) | --       | Enzo Life Sciences | Cisplatin     |

\*Unlabeled purified antibodies were conjugated to metal isotopes using Maxpar X8 Antibody Labeling Kits (Fluidigm) as per manufacturer's instructions.

**Supplemental Table 2. HLA-A\*0201 tetramers.**

| Specificity<br>Pool | Origin  | Position/<br>Protein | Peptide<br>Sequence | Metal Isotope Labels |       |       |
|---------------------|---------|----------------------|---------------------|----------------------|-------|-------|
|                     |         |                      |                     | Er168                | Er169 | Yb174 |
| Islet               | PPI     | 15-24                | ALWGPEPAAA          | X                    |       | X     |
|                     | GAD65   | 114-123              | VMNILLQYVV          | X                    |       | X     |
|                     | IGRP    | 265-273              | VLFGLGFAI           | X                    |       | X     |
|                     | ppIAPP  | 5-13                 | KLQFLIVL            | X                    |       | X     |
| Insulin             | Insulin | B 10-18              | HLVEALYLV           |                      | X     | X     |
| Virus               | CMV     | pp65                 | NLVPMVATV           | X                    | X     |       |
|                     | EBV     | LMP2                 | CLGGLTMV            | X                    | X     |       |

Abbreviations: PPI, preproinsulin; GAD, glutamic acid decarboxylase; IGRP, islet-specific glucose-6-phosphatase catalytic subunit-related protein; ppIAPP, prepro-islet amyloid polypeptide; CMV, cytomegalovirus; EBV, Epstein-Barr virus.

**Supplemental Table 3. Individual subject demographics.**

| Cohort                                    | ID                | Gender              | Race        | Disease                |                             |                             |      |
|-------------------------------------------|-------------------|---------------------|-------------|------------------------|-----------------------------|-----------------------------|------|
|                                           |                   |                     |             | Age (years)<br>at draw | Age (years)<br>at diagnosis | duration (years)<br>at draw |      |
| Healthy controls                          | HC-01             | Male                | White       | 5                      | NA                          | NA                          |      |
|                                           | HC-02             | Female              | White       | 13                     | NA                          | NA                          |      |
|                                           | HC-03             | Male                | White       | 14                     | NA                          | NA                          |      |
|                                           | HC-04             | Female              | White       | 16                     | NA                          | NA                          |      |
|                                           | HC-05             | Male                | White       | 17                     | NA                          | NA                          |      |
|                                           | HC-06             | Female              | Multiracial | 18                     | NA                          | NA                          |      |
|                                           | HC-07             | Male                | Unknown     | 18                     | NA                          | NA                          |      |
|                                           | HC-08             | Female              | White       | 19                     | NA                          | NA                          |      |
|                                           | HC-09             | Male                | White/Asian | 20                     | NA                          | NA                          |      |
|                                           | HC-10             | Female              | White       | 20                     | NA                          | NA                          |      |
|                                           | HC-11             | Female              | Multiracial | 20                     | NA                          | NA                          |      |
|                                           | HC-12             | Female              | Asian       | 20                     | NA                          | NA                          |      |
|                                           | HC-13             | Female              | White       | 20                     | NA                          | NA                          |      |
|                                           | HC-14             | Male                | White       | 20                     | NA                          | NA                          |      |
|                                           | HC-15             | Female              | White       | 24                     | NA                          | NA                          |      |
|                                           | HC-16             | Male                | Black       | 25                     | NA                          | NA                          |      |
|                                           | HC-17             | Female              | White       | 31                     | NA                          | NA                          |      |
|                                           | HC-18             | Male                | Unknown     | 37                     | NA                          | NA                          |      |
|                                           | HC-19             | Male                | White       | 41                     | NA                          | NA                          |      |
|                                           | HC-20             | Male                | Asian       | 43                     | NA                          | NA                          |      |
| T1D disease progression rate <sup>a</sup> | Rapid Progression | T1D-01 <sup>o</sup> | Male        | Unknown                | 9                           | 7.2                         | 1.9  |
|                                           |                   | T1D-02 <sup>o</sup> | Female      | Unknown                | 10                          | 10.0                        | 0.9  |
|                                           |                   | T1D-03              | Female      | White                  | 10                          | 9.0                         | 1.8  |
|                                           |                   | T1D-04 <sup>d</sup> | Male        | White                  | 12                          | 7.7                         | 4.8  |
|                                           |                   | T1D-05              | Female      | Unknown                | 15                          | 10.8                        | 4.2  |
|                                           |                   | T1D-06              | Male        | White                  | 15                          | 13.5                        | 1.9  |
|                                           |                   | T1D-07 <sup>o</sup> | Male        | White                  | 16                          | 12.5                        | 3.5  |
|                                           |                   | T1D-08 <sup>d</sup> | Male        | White                  | 16                          | 13.7                        | 3.2  |
|                                           |                   | T1D-09              | Female      | White                  | 17                          | 16.8                        | 0.8  |
|                                           |                   | T1D-10              | Female      | White                  | 20                          | 17.2                        | 3.8  |
|                                           |                   | T1D-11              | Female      | Unknown                | 26                          | 21.5                        | 4.7  |
|                                           |                   | T1D-12              | Female      | White                  | 27                          | 26.8                        | 1.1  |
|                                           |                   | T1D-13              | Female      | White                  | 30                          | 28.7                        | 2.3  |
|                                           |                   | T1D-14              | Male        | Asian                  | 57                          | 54.9                        | 2.5  |
|                                           | Slow Progression  | T1D-15              | Male        | White                  | 13                          | 4.9                         | 8.9  |
|                                           |                   | T1D-16 <sup>o</sup> | Female      | White                  | 15                          | 4.6                         | 10.7 |
|                                           |                   | T1D-17              | Female      | White                  | 15                          | 8.5                         | 7.3  |
|                                           |                   | T1D-18              | Male        | White                  | 15                          | 9.3                         | 6.6  |
|                                           |                   | T1D-19              | Female      | White                  | 15                          | 10.5                        | 5.4  |
|                                           |                   | T1D-20              | Female      | White                  | 17                          | 10.8                        | 6.3  |
|                                           |                   | T1D-21 <sup>o</sup> | Female      | Unknown                | 18                          | 13.0                        | 5.7  |
|                                           |                   | T1D-22 <sup>d</sup> | Female      | White                  | 19                          | 14.5                        | 5.2  |
|                                           |                   | T1D-23              | Female      | White                  | 20                          | 13.5                        | 6.8  |
|                                           |                   | T1D-24              | Female      | White                  | 21                          | 15.7                        | 5.6  |
|                                           |                   | T1D-25 <sup>o</sup> | Male        | White                  | 21                          | 14.0                        | 7.1  |
|                                           |                   | T1D-26              | Female      | White/Nat Amer         | 25                          | 21.0                        | 5.0  |
|                                           |                   | T1D-27              | Male        | Unknown                | 27                          | 17.5                        | 10.3 |
|                                           |                   | T1D-28              | Male        | White                  | 27                          | 20.4                        | 6.9  |
|                                           |                   | T1D-29              | Female      | White                  | 28                          | 22.1                        | 5.9  |
|                                           |                   | T1D-30              | Female      | White                  | 31                          | 26.0                        | 5.6  |
|                                           |                   | T1D-31 <sup>d</sup> | Female      | White                  | 32                          | 27.2                        | 5.5  |
|                                           |                   | T1D-32 <sup>c</sup> | Female      | White                  | 33                          | 5.4                         | 28.2 |
|                                           |                   | T1D-33              | Male        | White                  | 35                          | 29.7                        | 6.1  |
|                                           |                   | T1D-34 <sup>o</sup> | Female      | White                  | 36                          | 24.6                        | 12.2 |
|                                           |                   | T1D-35              | Male        | White                  | 37                          | 26.4                        | 11.0 |
|                                           |                   | T1D-36 <sup>c</sup> | Female      | White                  | 38                          | 24.8                        | 13.4 |
|                                           |                   | T1D-37              | Female      | White                  | 47                          | 17.3                        | 30.7 |
| T1D disease duration <sup>b</sup>         | <5 years          | T1D-38              | Female      | White                  | 12                          | 11.4                        | 1.6  |
|                                           |                   | T1D-39 <sup>c</sup> | Female      | White                  | 15                          | 13.9                        | 1.7  |
|                                           |                   | T1D-40 <sup>o</sup> | Female      | White                  | 25                          | 22.4                        | 2.9  |
|                                           |                   | T1D-41 <sup>o</sup> | Male        | White                  | 37                          | 35.2                        | 1.8  |
|                                           | ≥5 years          | T1D-42 <sup>o</sup> | Male        | White                  | 18                          | 7.7                         | 10.4 |
|                                           |                   | T1D-43              | Female      | White                  | 25                          | 18.9                        | 6.4  |
|                                           |                   | T1D-44 <sup>o</sup> | Female      | White/Nat Amer         | 35                          | 16.3                        | 19.4 |
|                                           |                   | T1D-45 <sup>c</sup> | Male        | White                  | 46                          | 36.9                        | 10.1 |
|                                           |                   | T1D-46 <sup>c</sup> | Female      | White                  | 61                          | 11.9                        | 49.2 |

<sup>a</sup> Rapid progressors are less than 5 years from diagnosis and have undetectable C-peptide (<0.05 ng/mL); slow progressors are 5 or more years from diagnosis but retain detectable C-peptide (>0.1 ng/mL).

<sup>b</sup> < 5 years from diagnosis and have detectable C-peptide (>0.1 ng/mL); ≥ 5 years from diagnosis and have undetectable C-peptide (<0.05 ng/mL).

<sup>c</sup> Sample was used in reproducibility testing.

<sup>d</sup> A second sample from a later time point was also assayed.

<sup>e</sup> Sample was tested in functional studies.

Nat Amer, Native American.
